# Supplementary material for: Hydrogen bond strengths in microhydrated clusters of HNO and HONO: energetic insights via a molecular tailoring approach
Source: Royal Society of Chemistry journal article supplement (doi:10.1039/d4nj02163k), 2024-01-01
Supplement: d4nj02163k1.pdf [file d4nj02163k1.pdf]

## Supplementary information

### **Hydrogen bond strengths in microhydrated clusters of HNO and HONO: Energetic insights via molecular tailoring approach**

Thufail M. Ismail,<sup>a</sup> Deepak Patkar,<sup>b</sup> Pookkottu K. Sajith,\*<sup>a</sup> and Milind M. Deshmukh\*<sup>b</sup>

<sup>a</sup>*Department of Chemistry, Farook College, Kozhikode, Kerala-673632, India.*

<sup>b</sup>*Department of Chemistry, Dr. Harisingh Gour Vishwavidyalaya (A Central University), Sagar – 470003, India.*

#### **Corresponding Authors:**

Pookkottu K. Sajith

Department of Chemistry, Farook College, Kozhikode-673632, Kerala, India

*Email: pksajith@farookcollege.ac.in, pksajisiv@gmail.com*

Milind M. Deshmukh

Department of Chemistry, Dr. Harisingh Gour Vishwavidyalaya (A Central University), Sagar- 470003, India.

*Email: milind.deshmukh@gmail.com, mdeshmukh@dhsgsu.edu.in*

## Table of contents

| Item            | Description                                                                                                                                          |
|-----------------|------------------------------------------------------------------------------------------------------------------------------------------------------|
| <b>Fig. S1</b>  | Optimized geometries of $\text{HNO}(\text{H}_2\text{O})_{n=3-4}$ complexes (with $\Delta E$ values above 5 kcal/mol).                                |
| <b>Table S1</b> | Structural parameters, MTA-based energies, and cooperativity contributions of individual HBs in $\text{HNO}(\text{H}_2\text{O})_{n=1-4}$ complexes.  |
| <b>Fig. S2</b>  | Optimized geometries of $\text{HONO}(\text{H}_2\text{O})_{n=3}$ complexes (with $\Delta E$ values above 5 kcal/mol).                                 |
| <b>Fig. S3</b>  | Optimized geometries of $\text{HONO}(\text{H}_2\text{O})_{n=4}$ complexes (with $\Delta E$ values above 3 kcal/mol)                                  |
| <b>Table S2</b> | Structural parameters, MTA-based energies, and cooperativity contributions of individual HBs in $\text{HONO}(\text{H}_2\text{O})_{n=1-4}$ complexes. |
| <b>Table S3</b> | Coordinates of the MP2/6-311++G(d,p) optimized structures of $\text{HNO}(\text{H}_2\text{O})_{n=1-4}$ Complexes                                      |
| <b>Table S4</b> | Coordinates of the MP2/6-311++G(d,p) optimized structures of $\text{HONO}(\text{H}_2\text{O})_{n=1-4}$ Complexes                                     |

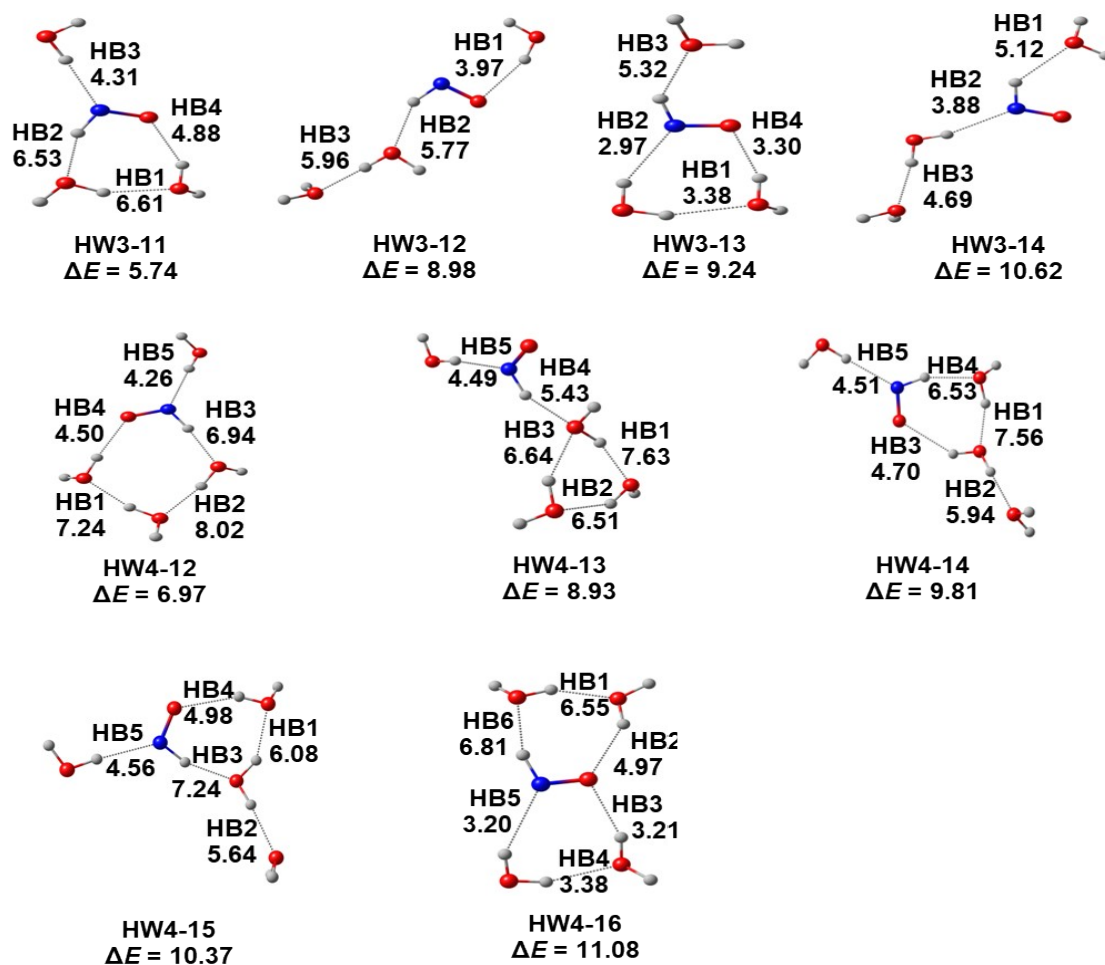

**Fig. S1** The MTA-based energies of individual HBs and relative energies ( $\Delta E$ ) of various isomers (with  $\Delta E$  values above 5 kcal/mol) in each category of  $\text{HNO}(\text{H}_2\text{O})_{n=3-4}$ . All energy values are in kcal/mol. Also see Fig. 3 and 4 in the main text.

**Table S1** The relevant structural parameters *viz.* distance (in Å) and bond angle (in degree), the MTA-based HB energies in complex ( $E_{HB}^{MTA}$ ), energy in dimer ( $E^{Dimer}$ ), and cooperativity contribution ( $E^{Coop}$ ) of all individual HBs in  $\text{HNO}(\text{H}_2\text{O})_{n=1-4}$  complexes. All energy values are in kcal/mol.

| Complex      | HB labels | HB distance | HB angle | $E_{HB}^{MTA}$ | $E^{Dimer}$ | $E^{Coop}$ |
|--------------|-----------|-------------|----------|----------------|-------------|------------|
| <b>HW1-1</b> | HB1       | 2.17        | 131      | -              | 5.11        | -          |
| <b>HW1-2</b> | HB1       | 2.12        | 166      | -              | 3.93        | -          |
| <b>HW1-3</b> | HB1       | 2.13        | 174      | -              | 2.93        | -          |
| <b>HW2-1</b> | HB1       | 2.02        | 157      | 6.02           | 4.20        | 1.83       |
|              | HB2       | 2.07        | 155      | 5.15           | 3.32        | 1.83       |
|              | HB3       | 1.88        | 153      | 6.64           | 4.81        | 1.83       |
| <b>HW2-2</b> | HB1       | 2.20        | 124      | 5.01           | 3.56        | 1.46       |
|              | HB2       | 2.10        | 144      | 5.35           | 3.89        | 1.46       |
|              | HB3       | 1.92        | 153      | 6.28           | 4.83        | 1.46       |
| <b>HW2-3</b> | HB1       | 2.06        | 140      | 5.36           | 4.78        | 0.59       |
|              | HB2       | 1.91        | 178      | 5.68           | 5.10        | 0.59       |
| <b>HW2-4</b> | HB1       | 2.09        | 173      | 4.39           | 3.86        | 0.53       |
|              | HB2       | 2.03        | 138      | 5.16           | 4.64        | 0.53       |
| <b>HW2-5</b> | HB1       | 2.46        | 149      | 2.71           | 2.88        | -0.17      |
|              | HB2       | 2.17        | 149      | 2.38           | 2.55        | -0.17      |
|              | HB3       | 2.03        | 161      | 3.68           | 3.85        | -0.17      |
| <b>HW2-6</b> | HB1       | 2.10        | 136      | 3.67           | 3.20        | 0.48       |
|              | HB2       | 2.11        | 169      | 5.26           | 4.78        | 0.48       |
| <b>HW2-7</b> | HB1       | 2.17        | 169      | 2.65           | 2.98        | -0.33      |
|              | HB2       | 1.98        | 174      | 4.80           | 5.13        | -0.33      |
| <b>HW3-1</b> | HB1       | 1.97        | 162      | 6.16           | 3.85        | 2.31       |
|              | HB2       | 2.01        | 147      | 5.73           | 3.34        | 2.40       |
|              | HB3       | 1.82        | 168      | 7.72           | 4.96        | 2.76       |
|              | HB4       | 1.82        | 167      | 7.58           | 4.91        | 2.68       |
| <b>HW3-2</b> | HB1       | 1.80        | 170      | 8.13           | 4.86        | 3.27       |
|              | HB2       | 1.81        | 165      | 7.64           | 4.85        | 2.79       |
|              | HB3       | 1.98        | 178      | 5.12           | 2.76        | 2.36       |
|              | HB4       | 1.95        | 172      | 6.53           | 3.69        | 2.84       |
| <b>HW3-3</b> | HB1       | 1.84        | 154      | 7.67           | 4.71        | 2.96       |
|              | HB2       | 1.91        | 149      | 6.84           | 4.44        | 2.40       |
|              | HB3       | 2.19        | 134      | 6.03           | 4.10        | 1.92       |
|              | HB4       | 2.04        | 167      | 4.27           | 3.55        | 0.72       |
|              | HB5       | 2.23        | 144      | 1.77           | 1.62        | 0.16       |
| <b>HW3-4</b> | HB1       | 1.87        | 153      | 7.29           | 4.81        | 2.47       |
|              | HB2       | 1.95        | 144      | 6.59           | 4.45        | 2.15       |
|              | HB3       | 1.96        | 147      | 6.89           | 4.87        | 2.02       |
|              | HB4       | 2.18        | 132      | 5.28           | 5.15        | 0.13       |
| <b>HW3-5</b> | HB1       | 1.84        | 172      | 7.18           | 5.00        | 2.18       |
|              | HB2       | 1.84        | 172      | 7.28           | 5.10        | 2.18       |
|              | HB3       | 2.33        | 101      | 4.63           | 3.02        | 1.61       |
|              | HB4       | 2.03        | 152      | 4.13           | 2.53        | 1.61       |
| <b>HW3-6</b> | HB1       | 1.85        | 154      | 7.65           | 4.83        | 2.82       |
|              | HB2       | 1.95        | 147      | 6.51           | 4.33        | 2.18       |

|               |     |      |     |      |      |       |
|---------------|-----|------|-----|------|------|-------|
|               | HB3 | 2.05 | 144 | 6.47 | 4.68 | 1.79  |
|               | HB4 | 2.40 | 109 | 3.39 | 3.10 | 0.30  |
|               | HB5 | 2.80 | 105 | 0.20 | 0.55 | -0.35 |
| <b>HW3-7</b>  | HB1 | 1.99 | 145 | 6.62 | 4.73 | 1.89  |
|               | HB2 | 1.94 | 148 | 6.72 | 4.50 | 2.22  |
|               | HB3 | 1.85 | 154 | 7.63 | 4.82 | 2.81  |
|               | HB4 | 2.11 | 171 | 3.90 | 3.68 | 0.21  |
| <b>HW3-8</b>  | HB1 | 1.80 | 161 | 7.52 | 4.79 | 2.73  |
|               | HB2 | 1.90 | 178 | 5.77 | 5.08 | 0.69  |
|               | HB3 | 2.17 | 148 | 4.91 | 3.27 | 1.64  |
|               | HB4 | 2.02 | 159 | 5.95 | 4.13 | 1.82  |
| <b>HW3-9</b>  | HB1 | 1.97 | 148 | 6.66 | 4.77 | 1.89  |
|               | HB2 | 1.94 | 148 | 6.75 | 4.49 | 2.26  |
|               | HB3 | 1.86 | 153 | 7.50 | 4.83 | 2.68  |
|               | HB4 | 2.09 | 175 | 3.02 | 2.92 | 0.10  |
| <b>HW3-10</b> | HB1 | 1.95 | 149 | 6.15 | 4.83 | 1.33  |
|               | HB2 | 1.93 | 176 | 5.39 | 5.10 | 0.30  |
|               | HB3 | 1.95 | 159 | 6.67 | 4.01 | 2.66  |
|               | HB4 | 2.05 | 159 | 5.19 | 3.38 | 1.81  |
| <b>HW3-11</b> | HB1 | 1.88 | 153 | 6.61 | 4.82 | 1.79  |
|               | HB2 | 1.96 | 157 | 6.53 | 3.99 | 2.53  |
|               | HB3 | 2.10 | 175 | 4.31 | 3.86 | 0.46  |
|               | HB4 | 2.15 | 150 | 4.88 | 3.31 | 1.57  |
| <b>HW3-12</b> | HB1 | 2.11 | 162 | 3.97 | 3.18 | 0.79  |
|               | HB2 | 1.99 | 149 | 5.77 | 4.30 | 1.47  |
|               | HB3 | 1.89 | 179 | 5.96 | 5.03 | 0.93  |
| <b>HW3-13</b> | HB1 | 2.04 | 158 | 3.38 | 3.61 | -0.23 |
|               | HB2 | 2.39 | 151 | 2.97 | 2.74 | 0.23  |
|               | HB3 | 2.05 | 143 | 5.32 | 4.47 | 0.85  |
|               | HB4 | 2.09 | 156 | 3.30 | 3.02 | 0.27  |
| <b>HW3-14</b> | HB1 | 2.11 | 135 | 5.12 | 4.81 | 0.31  |
|               | HB2 | 2.15 | 164 | 3.88 | 3.83 | 0.05  |
|               | HB3 | 1.99 | 173 | 4.69 | 5.13 | -0.43 |
| <b>HW4-1</b>  | HB1 | 1.74 | 168 | 9.06 | 4.67 | 4.38  |
|               | HB2 | 1.77 | 165 | 8.62 | 4.76 | 3.85  |
|               | HB3 | 1.78 | 165 | 8.44 | 4.81 | 3.63  |
|               | HB4 | 1.89 | 161 | 7.34 | 4.86 | 2.48  |
|               | HB5 | 2.12 | 166 | 3.77 | 3.44 | 0.33  |
|               | HB6 | 2.27 | 141 | 0.74 | 1.17 | -0.43 |
| <b>HW4-2</b>  | HB1 | 1.76 | 168 | 8.76 | 4.74 | 4.02  |
|               | HB2 | 1.77 | 166 | 8.55 | 4.77 | 3.78  |
|               | HB3 | 1.78 | 165 | 8.44 | 4.80 | 3.64  |
|               | HB4 | 1.91 | 161 | 7.34 | 4.85 | 2.48  |
|               | HB5 | 2.26 | 134 | 3.11 | 2.95 | 0.16  |
|               | HB6 | 2.34 | 129 | 1.06 | 1.33 | -0.27 |
| <b>HW4-3</b>  | HB1 | 1.88 | 158 | 6.67 | 4.73 | 1.94  |
|               | HB2 | 1.75 | 161 | 8.50 | 4.32 | 4.19  |
|               | HB3 | 1.75 | 164 | 8.67 | 4.64 | 4.03  |
|               | HB4 | 1.90 | 157 | 6.02 | 4.19 | 1.82  |
|               | HB5 | 2.23 | 149 | 3.50 | 3.08 | 0.42  |

|               |     |      |     |      |      |       |
|---------------|-----|------|-----|------|------|-------|
|               | HB6 | 2.26 | 137 | 3.15 | 2.67 | 0.48  |
| <b>HW4-4</b>  | HB1 | 1.77 | 175 | 8.23 | 4.83 | 3.40  |
|               | HB2 | 1.77 | 176 | 8.35 | 4.80 | 3.55  |
|               | HB3 | 1.78 | 174 | 8.05 | 4.82 | 3.22  |
|               | HB4 | 1.92 | 170 | 6.55 | 3.66 | 2.89  |
| <b>HW4-5</b>  | HB5 | 1.92 | 163 | 6.21 | 3.09 | 3.12  |
|               | HB1 | 2.10 | 145 | 2.18 | 2.42 | -0.24 |
|               | HB2 | 1.98 | 140 | 5.71 | 4.21 | 1.50  |
|               | HB3 | 2.13 | 143 | 5.53 | 4.02 | 1.51  |
|               | HB4 | 1.80 | 155 | 8.19 | 4.71 | 3.48  |
|               | HB5 | 2.18 | 135 | 5.49 | 4.22 | 1.26  |
| <b>HW4-6</b>  | HB6 | 1.99 | 164 | 5.74 | 3.64 | 2.10  |
|               | HB7 | 2.03 | 174 | 3.62 | 2.49 | 1.13  |
|               | HB1 | 1.84 | 164 | 7.11 | 4.50 | 2.61  |
|               | HB2 | 1.81 | 166 | 7.91 | 4.89 | 3.02  |
|               | HB3 | 1.81 | 165 | 7.87 | 4.46 | 3.41  |
|               | HB4 | 1.75 | 169 | 8.85 | 4.73 | 4.12  |
|               | HB5 | 2.11 | 180 | 4.10 | 3.84 | 0.26  |
| <b>HW4-7</b>  | HB1 | 2.17 | 141 | 5.26 | 3.99 | 1.27  |
|               | HB2 | 1.96 | 142 | 5.77 | 4.23 | 1.53  |
|               | HB3 | 2.12 | 145 | 2.09 | 2.40 | -0.31 |
|               | HB4 | 2.23 | 134 | 5.38 | 4.12 | 1.27  |
|               | HB5 | 1.79 | 156 | 8.29 | 4.74 | 3.55  |
|               | HB6 | 2.14 | 137 | 4.79 | 3.09 | 1.70  |
|               | HB7 | 2.06 | 159 | 4.36 | 3.01 | 1.35  |
| <b>HW4-8</b>  | HB1 | 1.81 | 164 | 7.83 | 4.90 | 2.93  |
|               | HB2 | 1.80 | 167 | 8.19 | 4.87 | 3.32  |
|               | HB3 | 1.79 | 164 | 8.19 | 4.35 | 3.84  |
|               | HB4 | 1.82 | 168 | 7.05 | 4.15 | 2.90  |
|               | HB5 | 2.78 | 118 | 0.26 | 0.97 | -0.70 |
|               | HB6 | 2.27 | 147 | 3.24 | 3.01 | 0.23  |
| <b>HW4-9</b>  | HB1 | 1.96 | 152 | 3.44 | 2.64 | 0.80  |
|               | HB2 | 1.91 | 150 | 5.43 | 4.19 | 1.24  |
|               | HB3 | 2.23 | 136 | 5.82 | 3.81 | 2.01  |
|               | HB4 | 1.76 | 170 | 7.97 | 4.74 | 3.23  |
|               | HB5 | 1.94 | 164 | 6.10 | 3.45 | 2.65  |
|               | HB6 | 1.97 | 174 | 4.75 | 2.58 | 2.17  |
| <b>HW4-10</b> | HB1 | 1.85 | 163 | 7.19 | 4.56 | 2.64  |
|               | HB2 | 1.80 | 167 | 8.01 | 4.91 | 3.10  |
|               | HB3 | 1.80 | 165 | 7.87 | 4.42 | 3.44  |
|               | HB4 | 1.76 | 168 | 8.64 | 4.73 | 3.91  |
|               | HB5 | 2.09 | 175 | 2.99 | 2.95 | 0.04  |
| <b>HW4-11</b> | HB1 | 1.81 | 170 | 7.87 | 4.87 | 3.01  |
|               | HB2 | 1.79 | 168 | 8.15 | 4.79 | 3.36  |
|               | HB3 | 1.94 | 155 | 4.71 | 3.52 | 1.19  |
|               | HB4 | 2.31 | 134 | 4.42 | 2.78 | 1.64  |
|               | HB5 | 2.07 | 131 | 5.57 | 3.08 | 2.49  |
|               | HB6 | 2.09 | 149 | 3.34 | 2.60 | 0.74  |
| <b>HW4-12</b> | HB1 | 1.82 | 165 | 7.24 | 4.88 | 2.36  |
|               | HB2 | 1.79 | 170 | 8.02 | 4.84 | 3.18  |

|        |      |      |      |      |      |       |
|--------|------|------|------|------|------|-------|
| HW4-13 | HB3  | 1.89 | 173  | 6.94 | 3.37 | 3.57  |
|        | HB4  | 2.02 | 176  | 4.50 | 2.88 | 1.62  |
|        | HB5  | 2.09 | 172  | 4.26 | 3.80 | 0.46  |
|        | HB1  | 1.84 | 156  | 7.63 | 4.74 | 2.89  |
|        | HB2  | 1.95 | 143  | 6.51 | 4.41 | 2.10  |
| HW4-14 | HB3  | 2.02 | 144  | 6.64 | 4.78 | 1.86  |
|        | HB4  | 2.05 | 142  | 5.43 | 4.51 | 0.92  |
|        | HB5  | 2.08 | 170  | 4.49 | 3.86 | 0.62  |
|        | HB1  | 1.80 | 161  | 7.56 | 4.79 | 2.77  |
|        | HB2  | 1.89 | 179  | 5.94 | 5.06 | 0.88  |
| HW4-15 | HB3  | 2.29 | 142  | 4.70 | 3.09 | 1.60  |
|        | HB4  | 1.95 | 159  | 6.53 | 3.92 | 2.60  |
|        | HB5  | 2.08 | 179  | 4.51 | 3.82 | 0.69  |
|        | HB1  | 1.95 | 148  | 6.08 | 4.82 | 1.26  |
|        | HB2  | 1.91 | 174  | 5.64 | 5.12 | 0.52  |
| HW4-16 | HB3  | 1.88 | 162  | 7.24 | 3.56 | 3.68  |
|        | HB4  | 2.13 | 154  | 4.98 | 3.45 | 1.53  |
|        | HB5  | 2.08 | 174  | 4.56 | 3.85 | 0.72  |
|        | HB1  | 1.87 | 154  | 6.55 | 4.82 | 1.74  |
|        | HB2  | 2.20 | 147  | 4.97 | 3.26 | 1.71  |
|        | HB3  | 2.09 | 156  | 3.21 | 2.76 | 0.44  |
|        | HB4  | 2.05 | 159  | 3.38 | 3.62 | -0.24 |
| HB5    | 2.42 | 149  | 3.20 | 2.94 | 0.26 |       |
| HB6    | 1.94 | 159  | 6.81 | 3.94 | 2.87 |       |

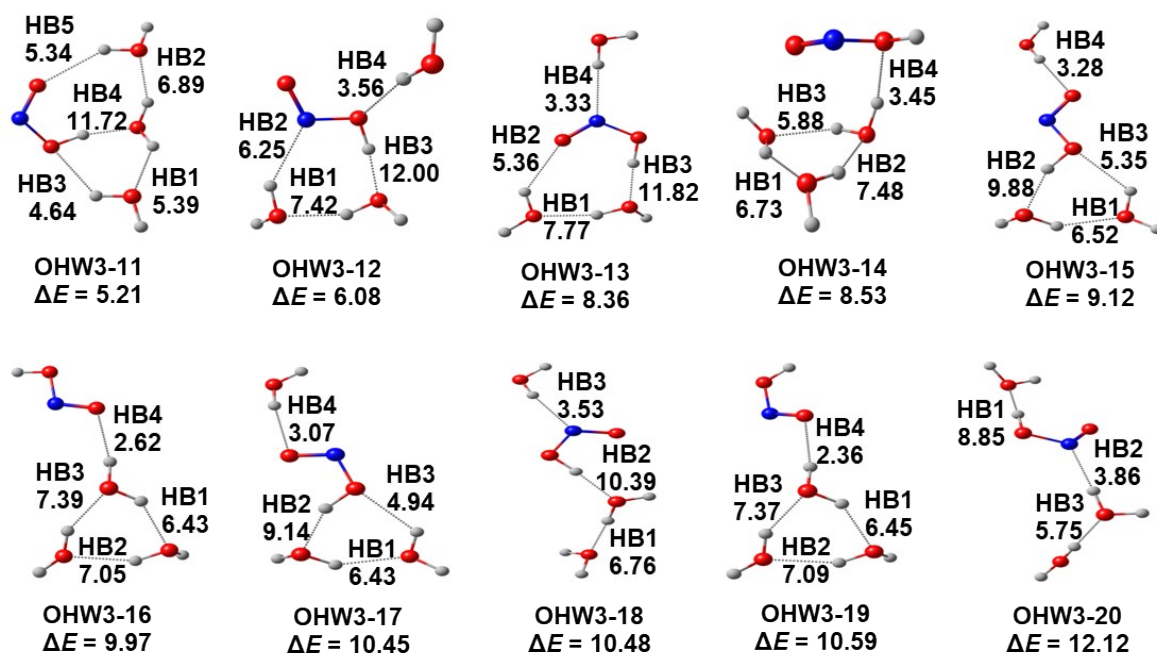

**Fig. S2** The MTA-based energies of individual HBs and relative energies ( $\Delta E$ ) of various isomers (with  $\Delta E$  values above 5 kcal/mol) of  $\text{HONO}(\text{H}_2\text{O})_{n=3}$  category. All energy values are in kcal/mol. Also see Fig. 7 of the main text.

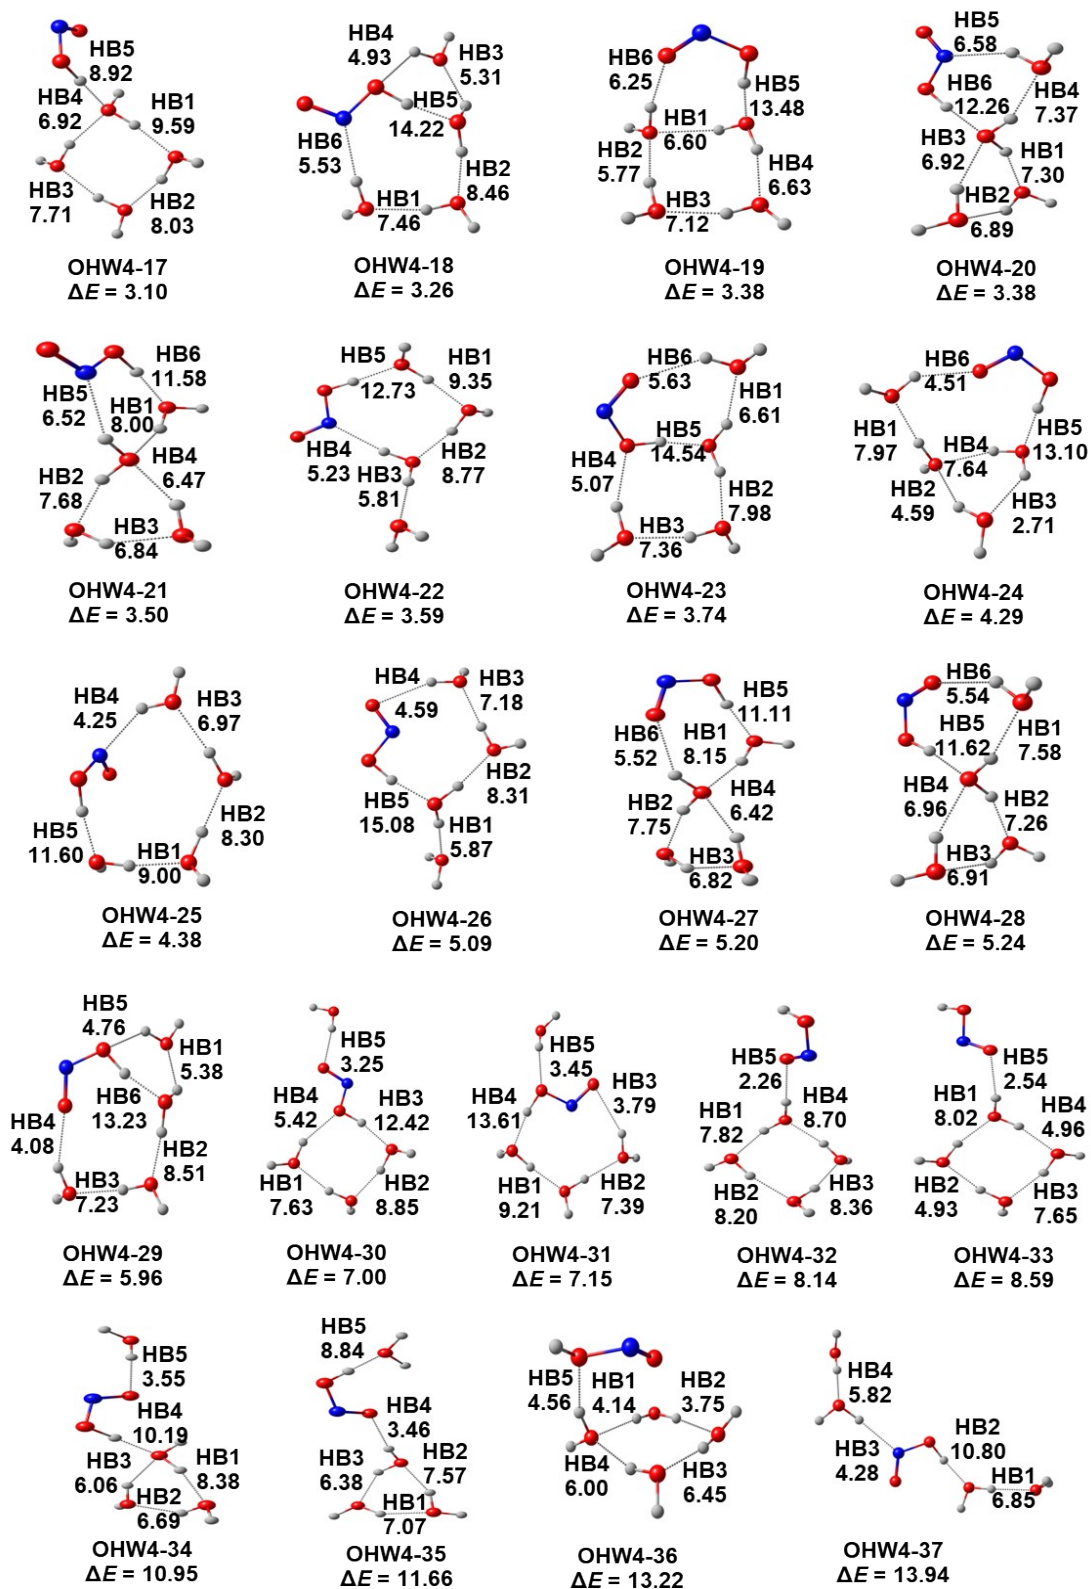

**Fig. S3** The MTA-based energies of individual HBs and relative energies ( $\Delta E$ ) of various isomers (with  $\Delta E$  values above 3 kcal/mol) of HONO(H<sub>2</sub>O)<sub>n=4</sub> category. All energy values are in kcal/mol. Also see Fig. 8 of the main text.



**Table S2** The relevant structural parameters *viz.* distance (in Å) and bond angle (in degree), the MTA-based HB energies in complex ( $E_{HB}^{MTA}$ ), energy in dimer ( $E^{Dimer}$ ), and cooperativity contribution ( $E^{Coop}$ ) of all individual HBs in HONO(H<sub>2</sub>O)<sub>n=1-4</sub> complexes. All energy values are in kcal/mol.

| Complex        | HB labels | HB distance | HB angle | $E_{HB}^{MTA}$ | $E^{Dimer}$ | $E^{Coop}$ |
|----------------|-----------|-------------|----------|----------------|-------------|------------|
| <b>OHW1-1</b>  | HB1       | 1.81        | 174      | -              | 8.20        | -          |
| <b>OHW1-2</b>  | HB1       | 1.81        | 178      | -              | 7.88        | -          |
| <b>OHW1-3</b>  | HB1       | 2.03        | 166      | -              | 3.52        | -          |
| <b>OHW1-4</b>  | HB1       | 2.05        | 160      | -              | 3.17        | -          |
| <b>OHW1-5</b>  | HB1       | 2.18        | 170      | -              | 2.55        | -          |
| <b>OHW1-6</b>  | HB1       | 2.25        | 179      | -              | 2.56        | -          |
| <b>OHW1-7</b>  | HB1       | 2.20        | 175      | -              | 2.49        | -          |
| <b>OHW2-1</b>  | HB1       | 1.83        | 154      | 7.47           | 4.75        | 2.72       |
|                | HB2       | 1.71        | 172      | 11.52          | 8.80        | 2.72       |
|                | HB3       | 2.18        | 148      | 6.51           | 3.79        | 2.72       |
| <b>OHW2-2</b>  | HB1       | 1.92        | 148      | 6.67           | 4.73        | 1.94       |
|                | HB2       | 1.78        | 153      | 8.82           | 6.88        | 1.94       |
|                | HB3       | 2.17        | 132      | 5.44           | 3.50        | 1.94       |
| <b>OHW2-3</b>  | HB1       | 1.84        | 157      | 7.19           | 4.50        | 2.69       |
|                | HB2       | 1.71        | 173      | 10.86          | 8.17        | 2.69       |
|                | HB3       | 2.15        | 145      | 5.39           | 2.70        | 2.69       |
| <b>OHW2-4</b>  | HB1       | 1.85        | 176      | 6.62           | 5.04        | 1.58       |
|                | HB2       | 1.72        | 178      | 9.98           | 8.40        | 1.58       |
| <b>OHW2-5</b>  | HB1       | 1.92        | 147      | 6.57           | 4.73        | 1.84       |
|                | HB2       | 1.80        | 149      | 8.17           | 6.33        | 1.84       |
|                | HB3       | 2.15        | 133      | 5.10           | 3.26        | 1.84       |
| <b>OHW2-6</b>  | HB1       | 1.86        | 177      | 6.50           | 5.06        | 1.44       |
|                | HB2       | 1.73        | 177      | 9.32           | 7.88        | 1.44       |
| <b>OHW2-7</b>  | HB1       | 2.11        | 170      | 3.53           | 2.86        | 0.67       |
|                | HB2       | 1.77        | 170      | 9.24           | 8.57        | 0.67       |
| <b>OHW2-8</b>  | HB1       | 2.20        | 172      | 3.21           | 2.60        | 0.61       |
|                | HB2       | 1.77        | 179      | 8.58           | 7.98        | 0.61       |
| <b>OHW2-9</b>  | HB1       | 1.96        | 175      | 4.90           | 5.14        | -0.23      |
|                | HB2       | 2.26        | 155      | 2.10           | 2.33        | -0.23      |
| <b>OHW2-10</b> | HB1       | 1.97        | 176      | 4.85           | 5.13        | -0.29      |
|                | HB2       | 2.30        | 169      | 2.08           | 2.37        | -0.29      |
| <b>OHW2-11</b> | HB1       | 1.96        | 175      | 4.92           | 5.13        | -0.22      |
|                | HB2       | 2.23        | 154      | 2.00           | 2.22        | -0.22      |
| <b>OHW3-1</b>  | HB1       | 1.74        | 172      | 9.06           | 4.65        | 4.42       |
|                | HB2       | 1.79        | 164      | 7.69           | 4.76        | 2.93       |
|                | HB3       | 2.03        | 173      | 5.57           | 2.99        | 2.59       |
|                | HB4       | 1.65        | 178      | 12.91          | 8.84        | 4.08       |
| <b>OHW3-2</b>  | HB1       | 1.81        | 165      | 7.76           | 4.62        | 3.13       |
|                | HB2       | 1.77        | 165      | 8.66           | 5.08        | 3.58       |
|                | HB3       | 1.67        | 165      | 10.84          | 7.45        | 3.39       |
|                | HB4       | 1.92        | 157      | 6.03           | 3.08        | 2.95       |
| <b>OHW3-3</b>  | HB1       | 1.76        | 172      | 9.02           | 4.83        | 4.20       |
|                | HB2       | 1.87        | 164      | 7.46           | 4.93        | 2.53       |

|                |     |      |     |       |      |      |
|----------------|-----|------|-----|-------|------|------|
|                | HB3 | 2.18 | 173 | 4.29  | 2.15 | 2.13 |
|                | HB4 | 1.67 | 178 | 12.91 | 9.12 | 3.79 |
| <b>OHW3-4</b>  | HB1 | 1.82 | 165 | 7.66  | 4.89 | 2.77 |
|                | HB2 | 1.77 | 165 | 8.51  | 4.81 | 3.70 |
|                | HB3 | 1.68 | 162 | 10.51 | 7.02 | 3.49 |
|                | HB4 | 1.94 | 157 | 5.32  | 2.77 | 2.55 |
| <b>OHW3-5</b>  | HB1 | 1.76 | 179 | 9.03  | 4.77 | 4.26 |
|                | HB2 | 1.83 | 173 | 7.44  | 4.91 | 2.53 |
|                | HB3 | 2.03 | 142 | 4.10  | 1.84 | 2.27 |
|                | HB4 | 1.66 | 175 | 12.13 | 8.12 | 4.01 |
| <b>OHW3-6</b>  | HB1 | 1.77 | 157 | 8.54  | 4.64 | 3.89 |
|                | HB2 | 1.94 | 148 | 6.23  | 4.32 | 1.91 |
|                | HB3 | 2.23 | 133 | 5.92  | 4.24 | 1.68 |
|                | HB4 | 1.74 | 166 | 9.63  | 8.13 | 1.51 |
| <b>OHW3-7</b>  | HB1 | 1.90 | 151 | 7.00  | 4.81 | 2.19 |
|                | HB2 | 1.88 | 178 | 5.59  | 4.61 | 0.98 |
|                | HB3 | 1.63 | 173 | 13.49 | 8.96 | 4.54 |
|                | HB4 | 2.13 | 152 | 6.77  | 3.89 | 2.88 |
| <b>OHW3-8</b>  | HB1 | 1.76 | 160 | 8.48  | 4.59 | 3.88 |
|                | HB2 | 1.89 | 179 | 5.56  | 4.65 | 0.92 |
|                | HB3 | 2.31 | 142 | 6.62  | 3.72 | 2.89 |
|                | HB4 | 1.69 | 173 | 11.90 | 8.78 | 3.12 |
| <b>OHW3-9</b>  | HB1 | 2.16 | 130 | 5.50  | 4.19 | 1.31 |
|                | HB2 | 1.94 | 147 | 6.34  | 4.58 | 1.75 |
|                | HB3 | 1.79 | 158 | 8.68  | 4.68 | 4.00 |
|                | HB4 | 1.79 | 169 | 9.07  | 7.79 | 1.28 |
|                | HB5 | 2.75 | 109 | 3.03  | 1.31 | 1.72 |
| <b>OHW3-10</b> | HB1 | 1.80 | 158 | 8.16  | 4.73 | 3.42 |
|                | HB2 | 1.92 | 144 | 6.73  | 4.62 | 2.11 |
|                | HB3 | 2.10 | 139 | 6.18  | 4.45 | 1.74 |
|                | HB4 | 1.76 | 178 | 8.92  | 8.08 | 0.84 |
| <b>OHW3-11</b> | HB1 | 2.04 | 137 | 5.39  | 4.26 | 1.13 |
|                | HB2 | 1.88 | 154 | 6.89  | 4.84 | 2.05 |
|                | HB3 | 2.29 | 130 | 4.64  | 3.12 | 1.51 |
|                | HB4 | 1.62 | 164 | 11.72 | 7.30 | 4.42 |
|                | HB5 | 2.22 | 146 | 5.34  | 2.91 | 2.43 |
| <b>OHW3-12</b> | HB1 | 1.84 | 154 | 7.42  | 4.74 | 2.68 |
|                | HB2 | 2.26 | 143 | 6.25  | 3.78 | 2.47 |
|                | HB3 | 1.66 | 174 | 12.00 | 8.50 | 3.50 |
|                | HB4 | 2.01 | 165 | 3.56  | 2.99 | 0.57 |
| <b>OHW3-13</b> | HB1 | 1.81 | 164 | 7.77  | 4.84 | 2.93 |
|                | HB2 | 2.25 | 137 | 5.36  | 2.61 | 2.75 |
|                | HB3 | 1.67 | 175 | 11.82 | 8.22 | 3.60 |
|                | HB4 | 2.17 | 179 | 3.33  | 2.67 | 0.65 |
| <b>OHW3-14</b> | HB1 | 1.96 | 148 | 6.73  | 4.84 | 1.89 |
|                | HB2 | 1.85 | 152 | 7.48  | 4.76 | 2.71 |
|                | HB3 | 2.02 | 144 | 5.88  | 4.74 | 1.14 |
|                | HB4 | 2.14 | 148 | 3.45  | 3.19 | 0.26 |
| <b>OHW3-15</b> | HB1 | 1.92 | 146 | 6.52  | 4.61 | 1.91 |
|                | HB2 | 1.72 | 158 | 9.88  | 7.32 | 2.55 |

|                |     |      |     |       |       |       |
|----------------|-----|------|-----|-------|-------|-------|
|                | HB3 | 2.28 | 127 | 5.35  | 3.48  | 1.87  |
|                | HB4 | 2.12 | 177 | 3.28  | 2.74  | 0.54  |
| <b>OHW3-16</b> | HB1 | 1.98 | 144 | 6.43  | 4.81  | 1.61  |
|                | HB2 | 1.92 | 150 | 7.05  | 4.85  | 2.20  |
|                | HB3 | 1.87 | 152 | 7.39  | 4.81  | 2.58  |
|                | HB4 | 2.16 | 168 | 2.62  | 0.23  | 2.39  |
| <b>OHW3-17</b> | HB1 | 1.92 | 146 | 6.43  | 4.60  | 1.83  |
|                | HB2 | 1.73 | 154 | 9.14  | 6.67  | 2.47  |
|                | HB3 | 2.29 | 128 | 4.94  | 3.20  | 1.73  |
|                | HB4 | 2.15 | 171 | 3.07  | 2.52  | 0.55  |
| <b>OHW3-18</b> | HB1 | 1.84 | 177 | 6.76  | 5.02  | 1.73  |
|                | HB2 | 1.68 | 175 | 10.39 | 8.00  | 2.39  |
|                | HB3 | 2.17 | 171 | 3.53  | 2.62  | 0.90  |
| <b>OHW3-19</b> | HB1 | 1.98 | 145 | 6.45  | 4.80  | 1.65  |
|                | HB2 | 1.91 | 150 | 7.09  | 4.84  | 2.25  |
|                | HB3 | 1.88 | 151 | 7.37  | 4.81  | 2.56  |
|                | HB4 | 2.15 | 170 | 2.36  | 0.18  | 2.18  |
| <b>OHW3-20</b> | HB1 | 1.76 | 178 | 8.85  | 7.98  | 0.87  |
|                | HB2 | 2.10 | 174 | 3.86  | 2.59  | 1.28  |
|                | HB3 | 1.91 | 180 | 5.75  | 5.12  | 0.64  |
| <b>OHW4-1</b>  | HB1 | 1.72 | 174 | 9.35  | 4.58  | 4.77  |
|                | HB2 | 1.75 | 176 | 8.68  | 4.73  | 3.96  |
|                | HB3 | 1.78 | 174 | 8.07  | 4.79  | 3.28  |
|                | HB4 | 1.88 | 168 | 5.70  | 2.74  | 2.96  |
|                | HB5 | 1.62 | 174 | 12.30 | 7.72  | 4.57  |
| <b>OHW4-2</b>  | HB1 | 1.71 | 177 | 9.45  | 4.41  | 5.04  |
|                | HB2 | 1.75 | 173 | 8.60  | 4.75  | 3.85  |
|                | HB3 | 1.78 | 172 | 7.79  | 4.72  | 3.07  |
|                | HB4 | 2.02 | 169 | 5.13  | 2.64  | 2.49  |
|                | HB5 | 1.62 | 177 | 13.21 | 8.66  | 4.55  |
| <b>OHW4-3</b>  | HB1 | 1.71 | 169 | 9.75  | 4.47  | 5.28  |
|                | HB2 | 1.76 | 166 | 8.65  | 4.72  | 3.93  |
|                | HB3 | 1.80 | 165 | 8.00  | 4.88  | 3.12  |
|                | HB4 | 2.03 | 153 | 6.84  | 4.69  | 2.15  |
|                | HB5 | 1.76 | 160 | 8.98  | 7.59  | 1.39  |
|                | HB6 | 2.45 | 120 | -0.72 | -0.08 | -0.64 |
| <b>OHW4-4</b>  | HB1 | 1.78 | 166 | 7.04  | 3.66  | 3.38  |
|                | HB2 | 1.83 | 161 | 7.30  | 4.56  | 2.74  |
|                | HB3 | 1.86 | 169 | 6.08  | 4.51  | 1.57  |
|                | HB4 | 2.27 | 132 | 6.07  | 3.89  | 2.17  |
|                | HB5 | 1.61 | 175 | 14.08 | 8.99  | 5.09  |
|                | HB6 | 1.98 | 165 | 6.67  | 3.51  | 3.16  |
| <b>OHW4-5</b>  | HB1 | 1.94 | 150 | 5.66  | 4.35  | 1.31  |
|                | HB2 | 1.71 | 164 | 9.47  | 4.10  | 5.37  |
|                | HB3 | 1.75 | 164 | 8.79  | 4.56  | 4.23  |
|                | HB4 | 1.86 | 161 | 6.74  | 4.68  | 2.06  |
|                | HB5 | 2.50 | 133 | 2.19  | 1.59  | 0.59  |
|                | HB6 | 1.79 | 175 | 9.46  | 8.22  | 1.23  |
| <b>OHW4-6</b>  | HB1 | 1.72 | 174 | 9.30  | 4.62  | 4.68  |
|                | HB2 | 1.75 | 174 | 8.62  | 4.74  | 3.89  |

|                |     |      |     |       |       |       |
|----------------|-----|------|-----|-------|-------|-------|
|                | HB3 | 1.78 | 174 | 8.06  | 4.83  | 3.23  |
|                | HB4 | 1.86 | 169 | 5.45  | 2.57  | 2.88  |
|                | HB5 | 1.62 | 171 | 11.67 | 7.26  | 4.40  |
| <b>OHW4-7</b>  | HB1 | 1.73 | 176 | 9.22  | 4.11  | 5.11  |
|                | HB2 | 1.76 | 177 | 8.49  | 4.62  | 3.87  |
|                | HB3 | 1.82 | 176 | 7.28  | 4.49  | 2.79  |
|                | HB4 | 1.95 | 164 | 5.61  | 2.83  | 2.78  |
|                | HB5 | 1.62 | 173 | 13.86 | 8.99  | 4.86  |
| <b>OHW4-8</b>  | HB1 | 1.71 | 161 | 9.31  | 4.13  | 5.17  |
|                | HB2 | 1.99 | 153 | 5.77  | 4.56  | 1.21  |
|                | HB3 | 1.90 | 157 | 5.77  | 4.11  | 1.66  |
|                | HB4 | 1.77 | 162 | 8.43  | 4.48  | 3.95  |
|                | HB5 | 2.29 | 132 | 2.82  | 2.19  | 0.63  |
|                | HB6 | 1.76 | 166 | 9.17  | 7.72  | 1.45  |
| <b>OHW4-9</b>  | HB1 | 1.93 | 148 | 6.52  | 4.73  | 1.79  |
|                | HB2 | 1.81 | 160 | 7.94  | 4.89  | 3.05  |
|                | HB3 | 1.85 | 165 | 7.29  | 4.95  | 2.35  |
|                | HB4 | 1.99 | 154 | 5.20  | 2.85  | 2.34  |
|                | HB5 | 1.54 | 174 | 14.88 | 8.19  | 6.70  |
|                | HB6 | 2.26 | 145 | 6.34  | 4.03  | 2.31  |
| <b>OHW4-10</b> | HB1 | 1.72 | 172 | 9.60  | 4.54  | 5.06  |
|                | HB2 | 1.78 | 159 | 7.94  | 4.19  | 3.75  |
|                | HB3 | 1.99 | 150 | 4.28  | 3.13  | 1.15  |
|                | HB4 | 2.13 | 152 | 4.04  | 2.80  | 1.24  |
|                | HB5 | 2.19 | 153 | 5.04  | 2.56  | 2.48  |
|                | HB6 | 1.61 | 175 | 14.12 | 8.98  | 5.14  |
| <b>OHW4-11</b> | HB1 | 1.70 | 171 | 9.72  | 4.41  | 5.31  |
|                | HB2 | 1.79 | 163 | 8.06  | 4.37  | 3.68  |
|                | HB3 | 1.81 | 164 | 7.64  | 4.81  | 2.83  |
|                | HB4 | 1.90 | 161 | 6.91  | 4.74  | 2.17  |
|                | HB5 | 1.77 | 172 | 9.38  | 8.40  | 0.98  |
| <b>OHW4-12</b> | HB1 | 1.71 | 169 | 9.62  | 4.51  | 5.12  |
|                | HB2 | 1.76 | 166 | 8.61  | 4.74  | 3.88  |
|                | HB3 | 1.80 | 165 | 8.03  | 4.87  | 3.16  |
|                | HB4 | 1.99 | 155 | 6.95  | 4.75  | 2.20  |
|                | HB5 | 2.46 | 120 | -0.66 | -0.02 | -0.64 |
|                | HB6 | 1.80 | 154 | 8.03  | 6.86  | 1.17  |
| <b>OHW4-13</b> | HB1 | 1.84 | 164 | 7.20  | 4.90  | 2.29  |
|                | HB2 | 1.92 | 154 | 5.97  | 4.55  | 1.43  |
|                | HB3 | 1.71 | 167 | 9.52  | 4.07  | 5.45  |
|                | HB4 | 1.75 | 167 | 8.89  | 4.69  | 4.19  |
|                | HB5 | 1.81 | 171 | 8.65  | 7.59  | 1.06  |
|                | HB6 | 2.61 | 109 | 1.09  | 0.62  | 0.47  |
| <b>OHW4-14</b> | HB1 | 1.73 | 176 | 9.54  | 4.49  | 5.05  |
|                | HB2 | 1.77 | 176 | 8.52  | 4.71  | 3.81  |
|                | HB3 | 1.80 | 172 | 7.68  | 4.86  | 2.83  |
|                | HB4 | 1.92 | 156 | 5.44  | 2.21  | 3.23  |
|                | HB5 | 1.63 | 174 | 12.48 | 8.06  | 4.41  |
| <b>OHW4-15</b> | HB1 | 2.02 | 139 | 2.83  | 1.83  | 1.00  |
|                | HB2 | 1.95 | 152 | 4.59  | 4.03  | 0.56  |

|                |     |      |     |       |      |       |
|----------------|-----|------|-----|-------|------|-------|
|                | HB3 | 2.04 | 154 | 7.51  | 4.51 | 3.00  |
|                | HB4 | 1.84 | 177 | 7.87  | 4.80 | 3.07  |
|                | HB5 | 2.10 | 155 | 4.84  | 2.30 | 2.54  |
|                | HB6 | 1.63 | 165 | 13.94 | 9.11 | 4.83  |
| <b>OHW4-16</b> | HB1 | 1.92 | 152 | 5.76  | 4.08 | 1.68  |
|                | HB2 | 1.77 | 159 | 8.55  | 4.62 | 3.93  |
|                | HB3 | 2.44 | 126 | 5.43  | 3.70 | 1.73  |
|                | HB4 | 1.77 | 159 | 7.84  | 4.27 | 3.58  |
|                | HB5 | 1.70 | 174 | 10.15 | 7.88 | 2.27  |
|                | HB6 | 2.52 | 125 | 2.67  | 1.65 | 1.02  |
|                | HB7 | 2.52 | 122 | 0.01  | 0.96 | -0.95 |
| <b>OHW4-17</b> | HB1 | 1.71 | 170 | 9.59  | 4.47 | 5.12  |
|                | HB2 | 1.79 | 163 | 8.03  | 4.37 | 3.66  |
|                | HB3 | 1.81 | 164 | 7.71  | 4.82 | 2.89  |
|                | HB4 | 1.89 | 162 | 6.92  | 4.73 | 2.19  |
|                | HB5 | 1.77 | 178 | 8.92  | 8.11 | 0.81  |
| <b>OHW4-18</b> | HB1 | 1.81 | 164 | 7.46  | 4.87 | 2.59  |
|                | HB2 | 1.77 | 169 | 8.46  | 4.86 | 3.60  |
|                | HB3 | 2.06 | 135 | 5.31  | 4.25 | 1.06  |
|                | HB4 | 2.31 | 128 | 4.93  | 3.36 | 1.58  |
|                | HB5 | 1.56 | 168 | 14.22 | 8.12 | 6.10  |
|                | HB6 | 2.05 | 173 | 5.53  | 3.16 | 2.36  |
| <b>OHW4-19</b> | HB1 | 2.11 | 142 | 6.60  | 4.26 | 2.33  |
|                | HB2 | 1.88 | 169 | 5.77  | 4.52 | 1.25  |
|                | HB3 | 1.84 | 160 | 7.12  | 4.60 | 2.52  |
|                | HB4 | 1.80 | 164 | 6.63  | 3.62 | 3.01  |
|                | HB5 | 1.61 | 171 | 13.48 | 8.10 | 5.38  |
|                | HB6 | 1.94 | 167 | 6.25  | 2.66 | 3.60  |
| <b>OHW4-20</b> | HB1 | 1.84 | 154 | 7.30  | 4.39 | 2.91  |
|                | HB2 | 1.93 | 144 | 6.89  | 4.74 | 2.15  |
|                | HB3 | 1.99 | 147 | 6.92  | 4.88 | 2.04  |
|                | HB4 | 1.84 | 155 | 7.37  | 4.77 | 2.60  |
|                | HB5 | 2.16 | 148 | 6.58  | 3.90 | 2.68  |
|                | HB6 | 1.68 | 174 | 12.26 | 8.87 | 3.39  |
| <b>OHW4-21</b> | HB1 | 1.81 | 157 | 8.00  | 4.82 | 3.18  |
|                | HB2 | 1.84 | 155 | 7.68  | 4.80 | 2.87  |
|                | HB3 | 1.94 | 144 | 6.84  | 4.73 | 2.11  |
|                | HB4 | 2.00 | 145 | 6.47  | 4.51 | 1.96  |
|                | HB5 | 2.20 | 148 | 6.52  | 3.72 | 2.79  |
|                | HB6 | 1.70 | 171 | 11.58 | 8.78 | 2.80  |
| <b>OHW4-22</b> | HB1 | 1.73 | 172 | 9.35  | 4.57 | 4.77  |
|                | HB2 | 1.73 | 166 | 8.77  | 4.57 | 4.20  |
|                | HB3 | 1.89 | 180 | 5.81  | 4.99 | 0.82  |
|                | HB4 | 2.09 | 171 | 5.23  | 3.03 | 2.20  |
|                | HB5 | 1.65 | 177 | 12.73 | 8.78 | 3.95  |
| <b>OHW4-23</b> | HB1 | 1.89 | 154 | 6.61  | 4.54 | 2.07  |
|                | HB2 | 1.81 | 162 | 7.98  | 4.97 | 3.01  |
|                | HB3 | 1.84 | 165 | 7.36  | 4.94 | 2.43  |
|                | HB4 | 1.96 | 156 | 5.07  | 2.65 | 2.42  |
|                | HB5 | 1.54 | 168 | 14.54 | 7.53 | 7.01  |

|                |     |      |     |       |       |      |
|----------------|-----|------|-----|-------|-------|------|
| <b>OHW4-24</b> | HB6 | 2.21 | 146 | 5.63  | 2.97  | 2.66 |
|                | HB1 | 1.79 | 173 | 7.97  | 4.81  | 3.16 |
|                | HB2 | 1.96 | 151 | 4.59  | 3.97  | 0.62 |
|                | HB3 | 2.01 | 141 | 2.71  | 1.86  | 0.84 |
|                | HB4 | 2.01 | 157 | 7.64  | 4.54  | 3.10 |
|                | HB5 | 1.62 | 177 | 13.10 | 8.10  | 5.01 |
| <b>OHW4-25</b> | HB6 | 1.99 | 144 | 4.51  | 1.83  | 2.68 |
|                | HB1 | 1.74 | 171 | 9.00  | 4.54  | 4.46 |
|                | HB2 | 1.77 | 178 | 8.30  | 4.78  | 3.52 |
|                | HB3 | 1.83 | 174 | 6.97  | 4.50  | 2.47 |
|                | HB4 | 2.08 | 146 | 4.25  | 2.16  | 2.09 |
|                | HB5 | 1.63 | 165 | 11.60 | 7.44  | 4.16 |
| <b>OHW4-26</b> | HB1 | 1.89 | 174 | 5.87  | 5.04  | 0.83 |
|                | HB2 | 1.81 | 173 | 8.31  | 5.01  | 3.30 |
|                | HB3 | 1.89 | 176 | 7.18  | 4.94  | 2.25 |
|                | HB4 | 2.17 | 155 | 4.59  | 2.18  | 2.40 |
|                | HB5 | 1.59 | 168 | 15.08 | 10.60 | 4.48 |
|                | HB6 | 2.18 | 145 | 5.52  | 2.66  | 2.87 |
| <b>OHW4-27</b> | HB1 | 1.80 | 163 | 8.15  | 4.83  | 3.31 |
|                | HB2 | 1.83 | 155 | 7.75  | 4.80  | 2.95 |
|                | HB3 | 1.94 | 144 | 6.82  | 4.72  | 2.10 |
|                | HB4 | 2.01 | 144 | 6.42  | 4.51  | 1.91 |
|                | HB5 | 1.70 | 174 | 11.11 | 8.21  | 2.89 |
|                | HB6 | 2.18 | 145 | 5.52  | 2.66  | 2.87 |
| <b>OHW4-28</b> | HB1 | 1.83 | 161 | 7.58  | 4.84  | 2.73 |
|                | HB2 | 1.85 | 153 | 7.26  | 4.43  | 2.84 |
|                | HB3 | 1.93 | 144 | 6.91  | 4.75  | 2.16 |
|                | HB4 | 1.98 | 148 | 6.96  | 4.88  | 2.08 |
|                | HB5 | 1.69 | 171 | 11.62 | 8.23  | 3.40 |
|                | HB6 | 2.14 | 145 | 5.54  | 2.77  | 2.77 |
| <b>OHW4-29</b> | HB1 | 2.07 | 135 | 5.38  | 4.29  | 1.09 |
|                | HB2 | 1.78 | 175 | 8.51  | 4.95  | 3.56 |
|                | HB3 | 1.83 | 172 | 7.23  | 4.98  | 2.25 |
|                | HB4 | 2.06 | 150 | 4.08  | 1.95  | 2.14 |
|                | HB5 | 2.25 | 131 | 4.76  | 3.14  | 1.61 |
|                | HB6 | 1.57 | 164 | 13.23 | 7.16  | 6.07 |
| <b>OHW4-30</b> | HB1 | 1.82 | 165 | 7.63  | 4.92  | 2.71 |
|                | HB2 | 1.76 | 165 | 8.85  | 4.74  | 4.11 |
|                | HB3 | 1.62 | 167 | 12.42 | 7.73  | 4.69 |
|                | HB4 | 1.96 | 154 | 5.42  | 3.05  | 2.36 |
|                | HB5 | 2.13 | 175 | 3.25  | 2.75  | 0.50 |
|                | HB6 | 1.57 | 164 | 13.23 | 7.16  | 6.07 |
| <b>OHW4-31</b> | HB1 | 1.82 | 165 | 7.63  | 4.92  | 2.71 |
|                | HB2 | 1.76 | 165 | 8.85  | 4.74  | 4.11 |
|                | HB3 | 1.62 | 167 | 12.42 | 7.73  | 4.69 |
|                | HB4 | 1.96 | 154 | 5.42  | 3.05  | 2.36 |
|                | HB5 | 2.13 | 175 | 3.25  | 2.75  | 0.50 |
|                | HB6 | 1.57 | 164 | 13.23 | 7.16  | 6.07 |
| <b>OHW4-32</b> | HB1 | 1.75 | 174 | 9.21  | 4.76  | 4.45 |
|                | HB2 | 1.86 | 176 | 7.39  | 4.95  | 2.44 |
|                | HB3 | 2.30 | 152 | 3.79  | 1.97  | 1.82 |
|                | HB4 | 1.62 | 167 | 13.61 | 8.83  | 4.79 |
|                | HB5 | 2.05 | 169 | 3.45  | 2.77  | 0.68 |
|                | HB6 | 1.57 | 164 | 13.23 | 7.16  | 6.07 |
| <b>OHW4-32</b> | HB1 | 1.81 | 165 | 7.82  | 4.93  | 2.89 |
|                | HB2 | 1.79 | 166 | 8.20  | 4.89  | 3.31 |
|                | HB3 | 1.78 | 166 | 8.36  | 4.84  | 3.52 |
|                | HB4 | 1.77 | 167 | 8.70  | 4.79  | 3.91 |
|                | HB5 | 2.15 | 177 | 2.26  | 2.22  | 0.04 |

|                |     |      |     |       |      |       |
|----------------|-----|------|-----|-------|------|-------|
| <b>OHW4-33</b> | HB1 | 1.78 | 165 | 8.02  | 4.34 | 3.68  |
|                | HB2 | 1.79 | 167 | 4.93  | 1.72 | 3.21  |
|                | HB3 | 1.82 | 165 | 7.65  | 4.51 | 3.13  |
|                | HB4 | 1.81 | 165 | 4.96  | 1.72 | 3.24  |
|                | HB5 | 2.18 | 166 | 2.54  | 2.50 | 0.04  |
| <b>OHW4-34</b> | HB1 | 1.77 | 160 | 8.38  | 4.66 | 3.72  |
|                | HB2 | 1.92 | 144 | 6.69  | 4.60 | 2.08  |
|                | HB3 | 2.15 | 137 | 6.06  | 4.37 | 1.69  |
|                | HB4 | 1.71 | 178 | 10.19 | 8.32 | 1.88  |
|                | HB5 | 2.09 | 178 | 3.55  | 2.66 | 0.88  |
| <b>OHW4-35</b> | HB1 | 1.92 | 150 | 7.07  | 4.84 | 2.23  |
|                | HB2 | 1.86 | 153 | 7.57  | 4.77 | 2.80  |
|                | HB3 | 1.99 | 145 | 6.38  | 4.43 | 1.95  |
|                | HB4 | 2.05 | 171 | 3.46  | 2.55 | 0.92  |
|                | HB5 | 1.77 | 178 | 8.84  | 2.53 | 6.31  |
| <b>OHW4-36</b> | HB1 | 2.11 | 175 | 4.14  | 4.78 | -0.64 |
|                | HB2 | 2.01 | 162 | 3.75  | 3.72 | 0.04  |
|                | HB3 | 1.88 | 167 | 6.45  | 5.09 | 1.36  |
|                | HB4 | 1.87 | 158 | 6.00  | 4.53 | 1.47  |
|                | HB5 | 1.94 | 154 | 4.56  | 3.35 | 1.21  |
| <b>OHW4-37</b> | HB1 | 1.83 | 177 | 6.85  | 5.01 | 1.84  |
|                | HB2 | 1.67 | 176 | 10.80 | 9.03 | 1.76  |
|                | HB3 | 2.08 | 176 | 4.28  | 3.63 | 0.65  |
|                | HB4 | 1.91 | 177 | 5.82  | 5.04 | 0.78  |

**Table S3** Coordinates of the MP2/6-311++G(d,p) optimized structures of HNO(H<sub>2</sub>O)<sub>n=1-4</sub> complexes.

| <b>HNO(H<sub>2</sub>O)<sub>n=1-4</sub></b> |                 |                 |                 |   |                 |                 |                 |
|--------------------------------------------|-----------------|-----------------|-----------------|---|-----------------|-----------------|-----------------|
| <b>HW1-1</b>                               |                 |                 | <b>HW1-2</b>    |   |                 |                 |                 |
| N                                          | 1.219181000000  | 0.597893000000  | 0.003296000000  | N | -0.834855000000 | 0.353859000000  | -0.000268000000 |
| H                                          | 0.254783000000  | 1.005552000000  | 0.056190000000  | H | -1.167722000000 | 1.351398000000  | 0.000597000000  |
| O                                          | 1.092249000000  | -0.621609000000 | 0.004653000000  | O | -1.807979000000 | -0.383548000000 | 0.000133000000  |
| H                                          | -1.323637000000 | -0.806103000000 | 0.012724000000  | O | 2.215067000000  | 0.021655000000  | 0.000141000000  |
| O                                          | -1.703158000000 | 0.074609000000  | -0.057055000000 | H | 1.252942000000  | -0.039854000000 | -0.000675000000 |
| H                                          | -2.578134000000 | -0.008696000000 | 0.327230000000  | H | 2.502053000000  | -0.893416000000 | -0.000240000000 |
| <b>HW1-3</b>                               |                 |                 | <b>HW2-1</b>    |   |                 |                 |                 |
| N                                          | 1.597373000000  | -0.454623000000 | 0.044655000000  | N | 1.840599000000  | 0.371714000000  | -0.005027000000 |
| H                                          | 2.586977000000  | -0.135439000000 | -0.113803000000 | H | 1.011798000000  | 1.011129000000  | -0.018815000000 |
| O                                          | 0.874847000000  | 0.529742000000  | -0.022271000000 | O | 1.408955000000  | -0.779525000000 | 0.001398000000  |
| H                                          | -1.194769000000 | 0.045698000000  | 0.031802000000  | H | -1.471996000000 | 2.159511000000  | -0.415368000000 |
| O                                          | -2.123811000000 | -0.194479000000 | -0.039923000000 | O | -0.936921000000 | 1.536520000000  | 0.080185000000  |
| H                                          | -2.582111000000 | 0.590001000000  | 0.266972000000  | H | -1.421949000000 | 0.697657000000  | 0.031374000000  |
| <b>HW2-2</b>                               |                 |                 | <b>HW2-3</b>    |   |                 |                 |                 |
| N                                          | 1.175773000000  | -0.039693000000 | 0.006886000000  | N | 2.382850000000  | 0.688302000000  | 0.006464000000  |
| H                                          | 0.795059000000  | 0.935142000000  | 0.002530000000  | H | 1.364434000000  | 0.862586000000  | 0.175318000000  |
| O                                          | 2.398977000000  | -0.011397000000 | -0.007794000000 | O | 2.498902000000  | -0.512444000000 | -0.221258000000 |
| H                                          | -2.026618000000 | 1.950974000000  | -0.369337000000 | O | -0.412864000000 | -0.166522000000 | 0.374400000000  |
| O                                          | -1.351891000000 | 1.429367000000  | 0.068912000000  | H | -1.357324000000 | -0.118212000000 | 0.173637000000  |
| H                                          | -1.681324000000 | 0.518589000000  | 0.029670000000  | H | -0.156538000000 | -1.055643000000 | 0.119255000000  |
| O                                          | -1.441039000000 | -1.379021000000 | -0.083518000000 | O | -3.230508000000 | 0.018024000000  | -0.178264000000 |
| H                                          | -0.475465000000 | -1.336467000000 | -0.027906000000 | H | -3.553388000000 | 0.597113000000  | -0.873388000000 |
| H                                          | -1.690444000000 | -2.101978000000 | 0.496042000000  | H | -3.821381000000 | 0.183575000000  | 0.560899000000  |
| <b>HW2-4</b>                               |                 |                 | <b>HW2-5</b>    |   |                 |                 |                 |
| N                                          | -0.143968000000 | 0.146036000000  | 0.009021000000  | N | 1.532672000000  | -0.720056000000 | -0.064295000000 |
| H                                          | 0.613368000000  | -0.574666000000 | 0.044636000000  | H | 2.465719000000  | -1.175734000000 | -0.223359000000 |
| O                                          | 0.396135000000  | 1.246454000000  | 0.010915000000  | O | 1.720453000000  | 0.477559000000  | 0.098989000000  |
| O                                          | -3.115102000000 | -0.553467000000 | 0.010297000000  | H | -0.769632000000 | -1.575514000000 | -0.015922000000 |
| H                                          | -2.194663000000 | -0.262572000000 | -0.013470000000 | O | -1.711692000000 | -1.401662000000 | 0.051366000000  |
| H                                          | -3.610210000000 | 0.259153000000  | -0.108341000000 | H | -1.740189000000 | -0.440834000000 | -0.037353000000 |
| O                                          | 2.691019000000  | -0.636111000000 | -0.055672000000 | O | -1.129976000000 | 1.492644000000  | -0.125246000000 |
| H                                          | 3.421389000000  | -1.168864000000 | 0.266738000000  | H | -1.514022000000 | 2.199913000000  | 0.397788000000  |
| H                                          | 3.001474000000  | 0.269685000000  | 0.022971000000  | H | -0.200858000000 | 1.484231000000  | 0.128041000000  |
| <b>HW2-6</b>                               |                 |                 | <b>HW2-7</b>    |   |                 |                 |                 |
| N                                          | 0.113276000000  | 0.890772000000  | 0.024538000000  | O | -0.748446000000 | 1.289304000000  | 0.216360000000  |
| H                                          | 1.149343000000  | 1.033970000000  | 0.030276000000  | H | -1.392969000000 | 0.582533000000  | 0.093218000000  |
| O                                          | -0.075546000000 | -0.319323000000 | 0.113036000000  | H | 0.078646000000  | 0.897826000000  | -0.076133000000 |
| O                                          | -3.128658000000 | -0.276571000000 | -0.047906000000 | O | -2.871220000000 | -0.712397000000 | -0.114237000000 |
| H                                          | -2.176577000000 | -0.411553000000 | 0.000761000000  | H | -3.260214000000 | -1.045295000000 | 0.698417000000  |
| H                                          | -3.206011000000 | 0.677127000000  | -0.118334000000 | H | -3.621595000000 | -0.370141000000 | -0.606637000000 |
| H                                          | 2.512844000000  | -1.073843000000 | 0.026219000000  | O | 2.115284000000  | 0.208783000000  | -0.387114000000 |
| O                                          | 2.849715000000  | -0.183114000000 | -0.102449000000 | N | 2.398654000000  | -0.776696000000 | 0.278548000000  |
| H                                          | 3.763376000000  | -0.229040000000 | 0.187864000000  | H | 3.440612000000  | -0.913576000000 | 0.221228000000  |
| <b>HW3-1</b>                               |                 |                 | <b>HW3-2</b>    |   |                 |                 |                 |
| N                                          | -1.580631000000 | -0.039484000000 | -0.029369000000 | N | -2.348606000000 | 0.465194000000  | 0.076247000000  |
| H                                          | -1.171528000000 | 0.922829000000  | -0.028683000000 | H | -1.492275000000 | 1.065654000000  | 0.044459000000  |
| O                                          | -2.805040000000 | 0.020775000000  | -0.046039000000 | O | -1.975790000000 | -0.706959000000 | 0.046799000000  |
| H                                          | 0.796709000000  | 2.783078000000  | 0.535845000000  | O | 0.246351000000  | 1.945093000000  | -0.055491000000 |
| O                                          | 0.499650000000  | 2.035538000000  | 0.013629000000  | H | 1.073401000000  | 1.430573000000  | -0.005423000000 |
| H                                          | 1.259349000000  | 1.424694000000  | 0.004671000000  | H | 0.460606000000  | 2.686881000000  | -0.624814000000 |
| O                                          | 2.408052000000  | 0.018793000000  | -0.002129000000 | O | 0.696444000000  | -1.936567000000 | -0.034690000000 |
| H                                          | 1.866512000000  | -0.790715000000 | 0.033195000000  | H | 0.637401000000  | -2.650810000000 | -0.673109000000 |
| H                                          | 3.030750000000  | -0.141921000000 | -0.714321000000 | H | -0.193184000000 | -1.556067000000 | -0.011004000000 |
| H                                          | -0.292749000000 | -1.532696000000 | 0.002920000000  | H | 3.015507000000  | 0.133897000000  | 0.775783000000  |
| O                                          | 0.543657000000  | -2.030074000000 | 0.003121000000  | O | 2.408061000000  | 0.230288000000  | 0.039244000000  |
| H                                          | 0.404816000000  | -2.749139000000 | 0.623296000000  | H | 1.938262000000  | -0.621334000000 | -0.006520000000 |



|                                                                                                                                                                                                                                                                                                                                                                                                                                                                                                                                                                                                                                                                                             |                                                                                                                                                                                                                                                                                                                                                                                                                                                                                                                                                                                                                                                                                            |
|---------------------------------------------------------------------------------------------------------------------------------------------------------------------------------------------------------------------------------------------------------------------------------------------------------------------------------------------------------------------------------------------------------------------------------------------------------------------------------------------------------------------------------------------------------------------------------------------------------------------------------------------------------------------------------------------|--------------------------------------------------------------------------------------------------------------------------------------------------------------------------------------------------------------------------------------------------------------------------------------------------------------------------------------------------------------------------------------------------------------------------------------------------------------------------------------------------------------------------------------------------------------------------------------------------------------------------------------------------------------------------------------------|
| <p><b>HW3-3</b></p> <p>N 2.243336000000 0.607942000000 0.454359000000<br/> H 1.356153000000 1.034303000000 0.097242000000<br/> O 2.156831000000 -0.608164000000 0.298909000000<br/> O -0.531268000000 1.438436000000 -0.681157000000<br/> H -1.245494000000 1.189918000000 -0.066871000000<br/> H -0.822928000000 2.261711000000 -1.079605000000<br/> O -2.338785000000 -0.006622000000 0.804653000000<br/> H -2.553474000000 -0.222068000000 1.714208000000<br/> H -1.876464000000 -0.786336000000 0.452228000000<br/> H -0.497744000000 -0.672718000000 -1.238698000000<br/> O -0.584002000000 -1.501440000000 -0.750991000000<br/> H 0.314389000000 -1.638081000000 -0.430343000000</p>  | <p><b>HW3-4</b></p> <p>N -2.968732000000 0.122629000000 0.651074000000<br/> H -1.972244000000 0.093823000000 0.977931000000<br/> O -2.951516000000 -0.096896000000 -0.555378000000<br/> O -0.077844000000 -0.066210000000 -0.091870000000<br/> H 0.595824000000 -0.766182000000 -0.048227000000<br/> H -0.618204000000 -0.285884000000 -0.857307000000<br/> O 2.367366000000 -1.374854000000 0.013356000000<br/> H 2.867542000000 -1.902230000000 0.639337000000<br/> H 2.749303000000 -0.485132000000 -0.066777000000<br/> H 1.374433000000 1.251895000000 -0.092502000000<br/> O 2.330258000000 1.413933000000 -0.074269000000<br/> H 2.438362000000 2.227524000000 0.421769000000</p>   |
| <p><b>HW3-5</b></p> <p>N 0.371875000000 -1.518360000000 0.636799000000<br/> H -1.847111000000 -0.555460000000 -0.118531000000<br/> O -2.204680000000 0.341485000000 -0.076698000000<br/> H -2.885240000000 0.361468000000 -0.753372000000<br/> H -0.808870000000 1.537291000000 0.052290000000<br/> O 0.010234000000 2.056947000000 0.124080000000<br/> H -0.096452000000 2.552800000000 0.938772000000<br/> H 1.489396000000 0.989986000000 -0.098424000000<br/> O 2.186650000000 0.323784000000 -0.228683000000<br/> H 2.738037000000 0.696112000000 -0.919109000000<br/> H 1.366657000000 -1.759306000000 0.431827000000<br/> O -0.312146000000 -1.871512000000 -0.317581000000</p>      | <p><b>HW3-6</b></p> <p>O 0.534878000000 -0.599026000000 1.548349000000<br/> H 1.014105000000 -1.006078000000 2.273266000000<br/> H 0.914142000000 -0.994346000000 0.742247000000<br/> N -1.871909000000 0.324760000000 0.198573000000<br/> H -1.785384000000 -0.252578000000 1.068168000000<br/> O -1.869343000000 -0.433800000000 -0.762582000000<br/> H 1.087864000000 -1.278472000000 -1.772110000000<br/> O 1.537435000000 -0.932445000000 -0.997793000000<br/> H 1.440274000000 0.031627000000 -1.064143000000<br/> O 0.980361000000 1.692914000000 -0.160622000000<br/> H 0.803238000000 1.237337000000 0.674620000000<br/> H 0.162474000000 2.168049000000 -0.330880000000</p>      |
| <p><b>HW3-7</b></p> <p>O 0.258389000000 -0.219746000000 0.933550000000<br/> H -0.648172000000 -0.166755000000 0.607398000000<br/> H 0.653921000000 0.634692000000 0.707846000000<br/> N -2.535055000000 -0.284210000000 -0.326927000000<br/> H -2.723803000000 -0.890539000000 -1.165325000000<br/> O -3.560708000000 0.309070000000 -0.033545000000<br/> H 2.860797000000 2.122463000000 -0.036984000000<br/> O 2.145384000000 1.522810000000 -0.256451000000<br/> H 2.576257000000 0.669001000000 -0.420114000000<br/> O 2.461968000000 -1.270433000000 -0.352812000000<br/> H 1.628173000000 -1.176709000000 0.142438000000<br/> H 2.957945000000 -1.936284000000 0.127298000000</p>     | <p><b>HW3-8</b></p> <p>N 2.585753000000 -0.783306000000 -0.325028000000<br/> O 1.620045000000 -1.411986000000 0.104518000000<br/> H 2.307265000000 0.225679000000 -0.356531000000<br/> O 1.122443000000 1.855709000000 -0.237276000000<br/> H 0.310057000000 1.459335000000 0.127739000000<br/> H 1.227679000000 2.679138000000 0.243044000000<br/> O -0.847680000000 0.230389000000 0.763395000000<br/> H -0.301742000000 -0.556139000000 0.653779000000<br/> H -1.704180000000 -0.002304000000 0.377729000000<br/> O -3.403601000000 -0.415411000000 -0.355351000000<br/> H -4.180434000000 -0.376263000000 0.208421000000<br/> H -3.688575000000 -0.015916000000 -1.181265000000</p>    |
| <p><b>HW3-9</b></p> <p>O -0.200967000000 -0.091355000000 0.923338000000<br/> H 0.686059000000 -0.294246000000 0.608936000000<br/> H -0.752165000000 -0.821138000000 0.604662000000<br/> N 3.185367000000 0.498280000000 -0.318008000000<br/> H 4.161055000000 0.291567000000 -0.651717000000<br/> O 2.648035000000 -0.569143000000 -0.057463000000<br/> H -3.205471000000 -1.767954000000 -0.172589000000<br/> O -2.388762000000 -1.312669000000 -0.385381000000<br/> H -2.639283000000 -0.378970000000 -0.470493000000<br/> O -2.147738000000 1.482007000000 -0.252491000000<br/> H -1.340952000000 1.201693000000 0.215086000000<br/> H -2.491361000000 2.210372000000 0.268153000000</p> | <p><b>HW3-10</b></p> <p>N 1.725125000000 -1.635006000000 -0.014730000000<br/> O 2.423022000000 -0.634863000000 -0.180135000000<br/> H 0.748044000000 -1.299413000000 0.157723000000<br/> O -0.722177000000 -0.067318000000 0.500208000000<br/> H -0.400469000000 0.828549000000 0.329563000000<br/> H -1.650475000000 -0.064270000000 0.233598000000<br/> O 1.067728000000 2.014389000000 -0.140250000000<br/> H 1.706853000000 1.290140000000 -0.169141000000<br/> H 1.511577000000 2.709072000000 0.350737000000<br/> O -3.525320000000 -0.175176000000 -0.209713000000<br/> H -3.818995000000 -0.594487000000 -1.022436000000<br/> H -4.118434000000 -0.520804000000 0.462186000000</p> |
| <p><b>HW3-11</b></p> <p>N -0.813028000000 -0.048566000000 0.029159000000<br/> H -0.135411000000 0.749122000000 0.010119000000<br/> O -0.164611000000 -1.092311000000 0.044842000000<br/> H 1.974077000000 -1.245660000000 -0.025819000000<br/> O 2.839500000000 -0.829922000000 -0.121153000000<br/> H 3.427007000000 -1.354570000000 0.427401000000<br/> H -2.907715000000 0.076453000000 0.000762000000<br/> O -3.863695000000 0.204955000000 -0.039346000000<br/> H -4.211582000000 -0.687711000000 0.001744000000<br/> H 2.277790000000 0.955816000000 0.008957000000<br/> O 1.602774000000 1.648339000000 0.086849000000<br/> H 1.955284000000 2.398025000000 -0.396813000000</p>      | <p><b>HW3-12</b></p> <p>N -1.101956000000 0.539373000000 -0.331469000000<br/> H -0.062884000000 0.530858000000 -0.444820000000<br/> O -1.404125000000 -0.536222000000 0.182583000000<br/> O -4.373359000000 0.143742000000 0.186923000000<br/> H -3.497474000000 -0.250993000000 0.256099000000<br/> H -4.185519000000 0.990709000000 -0.223229000000<br/> H 1.532391000000 -1.326070000000 0.091856000000<br/> O 1.651711000000 -0.471441000000 -0.328360000000<br/> H 2.563928000000 -0.224966000000 -0.118501000000<br/> H 4.975047000000 0.360983000000 -0.469870000000<br/> O 4.353207000000 0.259670000000 0.255449000000<br/> H 4.568729000000 0.977882000000 0.855978000000</p>    |
| <p><b>HW3-13</b></p> <p>N 0.587654000000 0.490555000000 -0.207125000000<br/> H 1.577792000000 0.812930000000 -0.119046000000<br/> O 0.609358000000 -0.735276000000 -0.132979000000<br/> H -1.535073000000 1.589586000000 -0.130738000000<br/> O -2.476417000000 1.593353000000 0.063242000000<br/> H -2.657341000000 0.650233000000 0.160909000000</p>                                                                                                                                                                                                                                                                                                                                      | <p><b>HW3-14</b></p> <p>N 1.011917000000 0.112931000000 0.053270000000<br/> H 1.793189000000 -0.566329000000 -0.102524000000<br/> O 1.516932000000 1.211168000000 0.255479000000<br/> O -1.790801000000 -1.166577000000 0.287515000000<br/> H -1.008608000000 -0.615902000000 0.175944000000<br/> H -2.525042000000 -0.571151000000 0.098527000000</p>                                                                                                                                                                                                                                                                                                                                     |

|              |                 |                 |                 |              |                 |                 |                 |
|--------------|-----------------|-----------------|-----------------|--------------|-----------------|-----------------|-----------------|
| O            | -2.300917000000 | -1.362324000000 | 0.164090000000  | O            | 3.894761000000  | -0.411426000000 | -0.293580000000 |
| H            | -2.721115000000 | -1.976450000000 | -0.441878000000 | H            | 4.693870000000  | -0.879339000000 | -0.041713000000 |
| H            | -1.363362000000 | -1.410955000000 | -0.056664000000 | H            | 4.048542000000  | 0.494742000000  | -0.013311000000 |
| O            | 3.511008000000  | 0.153002000000  | 0.067858000000  | O            | -4.190377000000 | 0.455671000000  | -0.256050000000 |
| H            | 3.553389000000  | -0.793067000000 | 0.229607000000  | H            | -4.775855000000 | 0.561571000000  | 0.497902000000  |
| H            | 4.287881000000  | 0.503807000000  | 0.510006000000  | H            | -4.753644000000 | 0.075204000000  | -0.934623000000 |
| <b>HW4-1</b> |                 |                 |                 | <b>HW4-2</b> |                 |                 |                 |
| H            | -0.638465000000 | 1.527972000000  | 0.429369000000  | H            | 1.587629000000  | 1.509608000000  | -0.044869000000 |
| O            | 0.181889000000  | 1.380930000000  | 0.947562000000  | O            | 2.382134000000  | 1.295582000000  | -0.574406000000 |
| H            | -2.979547000000 | -1.880322000000 | -0.104202000000 | H            | 0.058926000000  | -2.031022000000 | 1.718312000000  |
| H            | 0.131085000000  | 2.012160000000  | 1.669614000000  | H            | 3.075208000000  | 1.855312000000  | -0.218316000000 |
| O            | -2.316391000000 | -1.303575000000 | -0.488943000000 | O            | -0.049563000000 | -1.392111000000 | 1.009858000000  |
| H            | -1.488925000000 | -1.516273000000 | -0.012766000000 | H            | 0.722958000000  | -1.538811000000 | 0.425138000000  |
| H            | -2.342874000000 | 0.463901000000  | -0.534108000000 | H            | 0.033182000000  | 0.506509000000  | 1.192586000000  |
| O            | -2.128999000000 | 1.416556000000  | -0.467484000000 | O            | 0.125117000000  | 1.445510000000  | 0.962897000000  |
| H            | -2.288905000000 | 1.769337000000  | -1.345325000000 | H            | -0.738749000000 | 1.651632000000  | 0.588673000000  |
| H            | 0.880064000000  | -1.662494000000 | 0.497021000000  | H            | 2.252908000000  | -1.759281000000 | -1.478914000000 |
| O            | 0.035464000000  | -1.442195000000 | 0.903602000000  | O            | 2.157628000000  | -1.424678000000 | -0.584784000000 |
| H            | 0.142654000000  | -0.501319000000 | 1.118690000000  | H            | 2.378295000000  | -0.473418000000 | -0.646687000000 |
| N            | 2.740222000000  | 0.539977000000  | -0.673230000000 | N            | -2.390429000000 | 0.199161000000  | -0.221400000000 |
| O            | 2.663436000000  | -0.673301000000 | -0.496377000000 | O            | -3.451348000000 | 0.027820000000  | -0.808193000000 |
| H            | 1.920164000000  | 0.979892000000  | -0.192551000000 | H            | -1.949089000000 | -0.731639000000 | -0.029099000000 |
| <b>HW4-3</b> |                 |                 |                 | <b>HW4-4</b> |                 |                 |                 |
| H            | -1.079360000000 | 1.512949000000  | -0.687292000000 | H            | -0.492679000000 | 3.005169000000  | -0.710131000000 |
| O            | -1.272416000000 | 1.998832000000  | 0.131555000000  | O            | -0.198426000000 | 2.374223000000  | -0.049515000000 |
| H            | -2.206054000000 | -2.338131000000 | 0.119487000000  | H            | -0.871687000000 | 1.668240000000  | -0.059209000000 |
| H            | -0.988624000000 | 2.899909000000  | -0.034280000000 | O            | -0.322905000000 | -2.360495000000 | 0.088620000000  |
| O            | -1.395018000000 | -1.862134000000 | -0.069875000000 | H            | -0.279684000000 | -3.113568000000 | 0.681174000000  |
| H            | -1.203978000000 | -1.342149000000 | 0.740715000000  | H            | 0.606410000000  | -2.077046000000 | -0.014663000000 |
| H            | -1.007381000000 | -0.704985000000 | -1.330641000000 | O            | 2.330575000000  | 1.311465000000  | 0.162499000000  |
| O            | -0.617746000000 | 0.065742000000  | -1.795235000000 | H            | 1.460578000000  | 1.743178000000  | 0.061334000000  |
| H            | -0.838966000000 | -0.063152000000 | -2.720400000000 | H            | 2.708662000000  | 1.715540000000  | 0.946436000000  |
| H            | 0.330975000000  | -0.101925000000 | 1.798575000000  | H            | 2.773069000000  | -1.571081000000 | -0.963421000000 |
| O            | -0.631238000000 | -0.124945000000 | 1.866021000000  | O            | 2.242638000000  | -1.409400000000 | -0.180390000000 |
| H            | -0.893018000000 | 0.732974000000  | 1.494086000000  | H            | 2.310891000000  | -0.444755000000 | -0.036636000000 |
| N            | 1.886183000000  | -0.063048000000 | 0.157796000000  | N            | -1.951837000000 | 0.077256000000  | -0.009612000000 |
| O            | 3.083608000000  | -0.087443000000 | -0.100595000000 | H            | -1.545472000000 | -0.884086000000 | 0.063463000000  |
| H            | 1.345598000000  | -0.074571000000 | -0.739781000000 | O            | -3.177785000000 | 0.011410000000  | -0.008844000000 |
| <b>HW4-5</b> |                 |                 |                 | <b>HW4-6</b> |                 |                 |                 |
| N            | 2.871292000000  | -0.506994000000 | 0.061402000000  | O            | -0.296570000000 | -0.512180000000 | -1.005479000000 |
| H            | 1.995915000000  | -1.071199000000 | 0.170327000000  | H            | -1.181735000000 | -0.496140000000 | -0.622200000000 |
| O            | 2.525940000000  | 0.650485000000  | -0.172454000000 | H            | 0.023387000000  | 0.404445000000  | -0.926435000000 |
| O            | 0.102180000000  | -1.660799000000 | 0.281547000000  | N            | -3.120758000000 | -0.465064000000 | -0.198137000000 |
| H            | -0.446275000000 | -1.286864000000 | 0.982780000000  | H            | -3.778285000000 | -1.271083000000 | 0.353205000000  |
| H            | -0.468385000000 | -1.548069000000 | -0.489052000000 | O            | -3.666922000000 | 0.562498000000  | 0.567146000000  |
| O            | -0.279242000000 | 1.701509000000  | -0.260904000000 | H            | 0.767382000000  | 2.669021000000  | -0.060386000000 |
| H            | -0.663404000000 | 1.253266000000  | -1.024402000000 | O            | 1.041448000000  | 1.897890000000  | -0.560745000000 |
| H            | 0.643798000000  | 1.413802000000  | -0.265324000000 | H            | 1.795925000000  | 1.535553000000  | -0.059369000000 |
| H            | -2.282432000000 | 0.630166000000  | 2.160198000000  | O            | 2.980731000000  | 0.489909000000  | 0.813175000000  |
| O            | -1.864733000000 | 0.243505000000  | 1.387660000000  | H            | 3.930303000000  | 0.478223000000  | 0.678520000000  |
| H            | -1.286548000000 | 0.940883000000  | 1.016443000000  | H            | 2.690707000000  | -0.423150000000 | 0.621939000000  |
| O            | -2.033928000000 | -0.418112000000 | -1.317474000000 | O            | 1.763630000000  | -1.886941000000 | -0.115557000000 |
| H            | -2.420115000000 | -0.276285000000 | -0.439456000000 | H            | 0.965965000000  | -1.495861000000 | -0.300254000000 |
| H            | -2.773325000000 | -0.639444000000 | -1.888330000000 | H            | 2.053093000000  | -2.554979000000 | -0.509205000000 |
| <b>HW4-7</b> |                 |                 |                 | <b>HW4-8</b> |                 |                 |                 |
| N            | 2.224448000000  | 0.064201000000  | -0.059860000000 | N            | -2.982265000000 | 0.546614000000  | -0.262800000000 |
| H            | 1.838843000000  | -0.883821000000 | 0.158134000000  | H            | -3.999850000000 | 0.805908000000  | -0.205983000000 |
| O            | 3.448895000000  | 0.034748000000  | -0.056438000000 | O            | -2.902547000000 | -0.639107000000 | -0.545991000000 |
| O            | -0.091920000000 | -1.772920000000 | 0.353436000000  | H            | -0.512593000000 | -1.907177000000 | 0.059886000000  |
| H            | -0.623355000000 | -1.353035000000 | 1.040748000000  | O            | 0.065441000000  | -1.493242000000 | 0.705329000000  |
| H            | -0.646421000000 | -1.635547000000 | -0.424588000000 | H            | 0.958624000000  | -1.578913000000 | 0.322195000000  |
| O            | -0.244222000000 | 1.718363000000  | -0.292883000000 | O            | 2.581808000000  | -1.246689000000 | -0.416575000000 |
| H            | -0.634471000000 | 1.287363000000  | -1.062877000000 | H            | 3.410790000000  | -1.508101000000 | -0.010424000000 |
| H            | 0.666980000000  | 1.386532000000  | -0.282614000000 | H            | 2.627348000000  | -0.272076000000 | -0.459569000000 |
| H            | -2.339330000000 | 0.808153000000  | 2.090512000000  | H            | -1.002821000000 | 1.439823000000  | 0.407296000000  |
| O            | -1.919192000000 | 0.357698000000  | 1.354710000000  | O            | -0.140063000000 | 1.277505000000  | 0.801977000000  |
| H            | -1.294024000000 | 1.005536000000  | 0.967970000000  | H            | -0.128649000000 | 0.304244000000  | 0.883086000000  |
| O            | -2.096244000000 | -0.377741000000 | -1.326204000000 | O            | 2.353958000000  | 1.495890000000  | -0.318064000000 |
| H            | -2.460590000000 | -0.177140000000 | -0.449994000000 | H            | 2.402617000000  | 2.147938000000  | -1.019599000000 |
| H            | -2.857304000000 | -0.568636000000 | -1.879228000000 | H            | 1.451611000000  | 1.587202000000  | 0.049306000000  |



**Table S4** Coordinates of the MP2/6-311++G(d,p) optimized structures of HONO(H<sub>2</sub>O)<sub>n=1-4</sub> complexes.

| HONO(H <sub>2</sub> O) <sub>n=1-4</sub> |                 |                 |               |                 |                 |                 |
|-----------------------------------------|-----------------|-----------------|---------------|-----------------|-----------------|-----------------|
| <b>OHW1-1</b>                           |                 |                 | <b>OHW1-2</b> |                 |                 |                 |
| O                                       | -2.363326000000 | -0.154433000000 | O             | -2.017735000000 | -0.066979000000 | -0.070440000000 |
| H                                       | -2.405589000000 | -1.106765000000 | H             | -1.904262000000 | -1.014583000000 | 0.050127000000  |
| H                                       | -2.998880000000 | 0.024709000000  | H             | -2.812637000000 | 0.153065000000  | 0.422373000000  |
| N                                       | 0.906509000000  | -0.393657000000 | N             | 1.410749000000  | 0.045910000000  | 0.011679000000  |
| O                                       | 0.243916000000  | 0.820315000000  | O             | 0.531313000000  | 1.084575000000  | -0.001106000000 |
| H                                       | -0.694447000000 | 0.539032000000  | H             | -0.380157000000 | 0.699567000000  | -0.015486000000 |
| O                                       | 2.088579000000  | -0.253553000000 | O             | 0.889149000000  | -1.037523000000 | 0.004200000000  |
| <b>OHW1-3</b>                           |                 |                 | <b>OHW1-4</b> |                 |                 |                 |
| O                                       | -2.480166000000 | -0.225627000000 | O             | -2.695230000000 | -0.205130000000 | -0.203207000000 |
| H                                       | -1.584923000000 | 0.023868000000  | H             | -3.233791000000 | -0.254614000000 | 0.588830000000  |
| H                                       | -2.770025000000 | -0.786453000000 | H             | -1.815849000000 | -0.001060000000 | 0.130026000000  |
| N                                       | 1.426979000000  | 0.183579000000  | N             | 1.193728000000  | -0.300156000000 | 0.434388000000  |
| O                                       | 0.261963000000  | 0.863354000000  | O             | 0.148143000000  | 0.598945000000  | 0.162690000000  |
| H                                       | 0.334170000000  | 1.740240000000  | H             | 0.409366000000  | 1.073909000000  | -0.651914000000 |
| O                                       | 1.472194000000  | -0.920565000000 | O             | 2.082609000000  | -0.233458000000 | -0.347940000000 |
| <b>OHW1-5</b>                           |                 |                 | <b>OHW1-6</b> |                 |                 |                 |
| O                                       | -2.819760000000 | -0.260715000000 | O             | 2.660478000000  | -0.079470000000 | 0.000080000000  |
| H                                       | -3.399913000000 | 0.503108000000  | H             | 2.878687000000  | 0.855168000000  | -0.000974000000 |
| H                                       | -1.939466000000 | 0.125501000000  | H             | 1.698805000000  | -0.084145000000 | 0.000442000000  |
| N                                       | 0.859386000000  | -0.352868000000 | N             | -0.550009000000 | -0.137309000000 | 0.000382000000  |
| O                                       | 2.219007000000  | -0.021067000000 | O             | -1.202593000000 | 1.076724000000  | 0.000000000000  |
| H                                       | 2.641378000000  | -0.892968000000 | H             | -2.157262000000 | 0.860451000000  | -0.000593000000 |
| O                                       | 0.186040000000  | 0.623586000000  | O             | -1.278928000000 | -1.081043000000 | -0.000202000000 |
| <b>OHW1-7</b>                           |                 |                 | <b>OHW2-1</b> |                 |                 |                 |
| O                                       | 2.863315000000  | -0.038340000000 | O             | 1.706551000000  | -1.240237000000 | -0.069217000000 |
| H                                       | 2.873368000000  | -0.977860000000 | H             | 1.971244000000  | -0.303914000000 | -0.040348000000 |
| H                                       | 1.934159000000  | 0.195162000000  | H             | 2.244711000000  | -1.676427000000 | 0.595423000000  |
| N                                       | -0.855854000000 | -0.408366000000 | N             | -1.111537000000 | 0.237065000000  | 0.014790000000  |
| O                                       | -2.202816000000 | -0.210595000000 | O             | -0.980991000000 | -1.115573000000 | -0.041984000000 |
| H                                       | -2.324824000000 | 0.759417000000  | H             | 0.001572000000  | -1.247313000000 | -0.041879000000 |
| O                                       | -0.221964000000 | 0.609164000000  | O             | -2.254828000000 | 0.590863000000  | 0.026236000000  |
| <b>OHW2-2</b>                           |                 |                 | <b>OHW2-3</b> |                 |                 |                 |
| O                                       | -2.060432000000 | -1.316120000000 | O             | -0.884260000000 | 1.608469000000  | -0.083197000000 |
| H                                       | -1.113463000000 | -1.454132000000 | H             | -1.558120000000 | 0.911161000000  | -0.009291000000 |
| H                                       | -2.478458000000 | -2.008627000000 | H             | -1.210616000000 | 2.343468000000  | 0.440407000000  |
| N                                       | 1.789502000000  | 0.434212000000  | N             | 1.772382000000  | -0.619480000000 | 0.020786000000  |
| O                                       | 0.537067000000  | -0.074982000000 | O             | 1.671768000000  | 0.719665000000  | 0.029187000000  |
| H                                       | -0.072803000000 | 0.695862000000  | H             | 0.707502000000  | 0.981958000000  | -0.006024000000 |
| O                                       | 2.624764000000  | -0.408426000000 | O             | 0.713862000000  | -1.200628000000 | -0.029777000000 |
| O                                       | -1.685520000000 | 1.439349000000  | O             | -2.254960000000 | -0.790652000000 | -0.045351000000 |
| H                                       | -2.158566000000 | 0.598062000000  | H             | -1.438302000000 | -1.301903000000 | -0.021257000000 |
| H                                       | -2.030257000000 | 2.010783000000  | H             | -2.878418000000 | -1.293161000000 | 0.483762000000  |
| <b>OHW2-4</b>                           |                 |                 | <b>OHW2-5</b> |                 |                 |                 |
| O                                       | 1.183497000000  | 1.143863000000  | O             | -1.119623000000 | 1.589801000000  | 0.148256000000  |
| H                                       | 1.188245000000  | 1.578105000000  | H             | -1.237023000000 | 2.290736000000  | -0.496793000000 |
| H                                       | 1.935007000000  | 0.529707000000  | H             | -1.838871000000 | 0.960593000000  | -0.019905000000 |
| N                                       | -1.858102000000 | -0.064189000000 | N             | 1.819959000000  | -0.686041000000 | 0.007972000000  |
| O                                       | -1.168835000000 | 0.121501000000  | O             | 0.478023000000  | -0.586232000000 | 0.303385000000  |
| H                                       | -0.319029000000 | 0.514885000000  | H             | 0.204065000000  | 0.367698000000  | 0.240537000000  |
| O                                       | -2.932538000000 | -0.550632000000 | O             | 2.337955000000  | 0.365743000000  | -0.224592000000 |
| O                                       | 3.308613000000  | -0.702445000000 | O             | -2.364454000000 | -0.878960000000 | -0.221000000000 |
| H                                       | 3.092665000000  | -1.638551000000 | H             | -3.006365000000 | -1.426339000000 | 0.236907000000  |
| H                                       | 3.983925000000  | -0.633121000000 | H             | -1.516733000000 | -1.313218000000 | -0.064945000000 |
| <b>OHW2-6</b>                           |                 |                 | <b>OHW2-7</b> |                 |                 |                 |
| O                                       | -0.853755000000 | -0.628746000000 | O             | -2.835592000000 | 1.050906000000  | -0.064784000000 |
| H                                       | -0.675841000000 | -1.500863000000 | H             | -3.473388000000 | 1.291593000000  | 0.612578000000  |
| H                                       | -1.735675000000 | -0.391602000000 | H             | -2.313913000000 | 1.847793000000  | -0.199750000000 |
| N                                       | 2.338511000000  | 0.346568000000  | N             | -0.010061000000 | -0.390590000000 | -0.021579000000 |
| O                                       | 1.275964000000  | 1.038211000000  | O             | -1.161121000000 | -1.121756000000 | 0.019289000000  |
| H                                       | 0.516715000000  | 0.400602000000  | H             | -1.845306000000 | -0.416313000000 | 0.002184000000  |
| O                                       | 2.124483000000  | -0.825085000000 | O             | 0.964172000000  | -1.087134000000 | -0.006564000000 |
| O                                       | -3.409762000000 | 0.148224000000  | O             | 3.171537000000  | 1.043484000000  | 0.025988000000  |

|                   |                 |                 |                   |                 |                 |
|-------------------|-----------------|-----------------|-------------------|-----------------|-----------------|
| H -3.479933000000 | 0.866751000000  | -0.969724000000 | H 2.559974000000  | 0.300078000000  | 0.005339000000  |
| H -4.090279000000 | 0.338310000000  | 0.315646000000  | H 4.031086000000  | 0.626971000000  | -0.060734000000 |
| <b>OHW2-8</b>     |                 |                 | <b>OHW2-9</b>     |                 |                 |
| O -3.034204000000 | -0.057031000000 | 0.028424000000  | O -4.045627000000 | -0.404534000000 | 0.062575000000  |
| H -3.066297000000 | 0.887103000000  | 0.209212000000  | H -4.580932000000 | -0.379434000000 | -0.734585000000 |
| H -3.760311000000 | -0.432731000000 | 0.533537000000  | H -4.624702000000 | -0.051610000000 | 0.742836000000  |
| N 0.389763000000  | 0.074548000000  | -0.098264000000 | N 2.061731000000  | 0.201786000000  | 0.261623000000  |
| O -0.434889000000 | -0.993957000000 | -0.101586000000 | O 3.383854000000  | -0.090314000000 | -0.125254000000 |
| H -1.365683000000 | -0.653165000000 | -0.050787000000 | H 3.860879000000  | 0.693700000000  | 0.184303000000  |
| O -0.167321000000 | 1.140911000000  | -0.041126000000 | O 1.327168000000  | -0.670364000000 | -0.055149000000 |
| O 3.526465000000  | -0.188733000000 | 0.136833000000  | O -1.422947000000 | 0.880416000000  | -0.127327000000 |
| H 2.569466000000  | -0.201414000000 | 0.029948000000  | H -0.764376000000 | 0.193160000000  | -0.004529000000 |
| H 3.774075000000  | 0.668843000000  | -0.214419000000 | H -2.262574000000 | 0.410059000000  | -0.058149000000 |
| <b>OHW2-10</b>    |                 |                 | <b>OHW2-11</b>    |                 |                 |
| O -3.420269000000 | -0.629461000000 | 0.381367000000  | O 3.793419000000  | -0.650878000000 | 0.099179000000  |
| H -4.077802000000 | -0.249393000000 | 0.969511000000  | H 4.569855000000  | -0.211851000000 | 0.455639000000  |
| H -3.940803000000 | -1.049529000000 | -0.308012000000 | H 4.123222000000  | -1.114268000000 | -0.674879000000 |
| N 1.513951000000  | -0.099334000000 | -0.003072000000 | N -1.904329000000 | -0.553738000000 | -0.035655000000 |
| O 2.551478000000  | 0.524085000000  | 0.652764000000  | O -3.233352000000 | -0.347702000000 | -0.311664000000 |
| H 3.337685000000  | -0.033788000000 | 0.483286000000  | H -3.447092000000 | 0.526495000000  | 0.073801000000  |
| O 1.832528000000  | -1.100605000000 | -0.569569000000 | O -1.405152000000 | 0.340871000000  | 0.582382000000  |
| O -1.383945000000 | 1.268202000000  | -0.544222000000 | O 1.484421000000  | 1.092691000000  | -0.322152000000 |
| H -0.537055000000 | 0.915475000000  | -0.260674000000 | H 0.754357000000  | 0.711383000000  | 0.170159000000  |
| H -2.018022000000 | 0.614797000000  | -0.225327000000 | H 2.215266000000  | 0.484549000000  | -0.157096000000 |
| <b>OHW3-1</b>     |                 |                 | <b>OHW3-2</b>     |                 |                 |
| O 0.968315000000  | -1.888798000000 | 0.076788000000  | H 0.846514000000  | 2.700972000000  | -0.745390000000 |
| H 1.682143000000  | -1.221460000000 | -0.002340000000 | O 0.919393000000  | 2.001440000000  | -0.092171000000 |
| H 1.236586000000  | -2.454771000000 | 0.804325000000  | H 0.107824000000  | 1.481410000000  | -0.196954000000 |
| N -1.563694000000 | 0.190286000000  | 0.002610000000  | H 1.208995000000  | -2.575128000000 | -0.724189000000 |
| O -1.564510000000 | -1.155001000000 | -0.102475000000 | O 0.938527000000  | -1.917301000000 | -0.079772000000 |
| H -0.601651000000 | -1.407027000000 | -0.038211000000 | H 1.721081000000  | -1.344095000000 | 0.051861000000  |
| O -2.666213000000 | 0.663417000000  | -0.034493000000 | H 2.280760000000  | 0.822659000000  | 0.103216000000  |
| O 2.770709000000  | 0.131413000000  | -0.070233000000 | O 2.828285000000  | 0.023546000000  | 0.216146000000  |
| H 2.204629000000  | 0.922847000000  | -0.008413000000 | H 3.356264000000  | 0.196861000000  | 0.998592000000  |
| H 3.355693000000  | 0.301854000000  | -0.811772000000 | N -2.170242000000 | -0.497922000000 | 0.227433000000  |
| O 0.798366000000  | 2.032709000000  | 0.046136000000  | O -0.967332000000 | -0.105262000000 | -0.365725000000 |
| H 0.625423000000  | 2.757892000000  | 0.650895000000  | O -2.964213000000 | 0.384656000000  | 0.220879000000  |
| H -0.010294000000 | 1.498734000000  | 0.061469000000  | H -0.367028000000 | -0.893856000000 | -0.274023000000 |
| <b>OHW3-3</b>     |                 |                 | <b>OHW3-4</b>     |                 |                 |
| O -2.078923000000 | 1.201274000000  | 0.007345000000  | H 1.526188000000  | 2.601360000000  | -0.602284000000 |
| H -2.547614000000 | 1.659496000000  | 0.708507000000  | O 1.544616000000  | 1.857317000000  | 0.003729000000  |
| H -1.186291000000 | 1.605796000000  | -0.005830000000 | H 0.612845000000  | 1.644513000000  | 0.163689000000  |
| N -0.179472000000 | -1.108363000000 | 0.034846000000  | H 0.079001000000  | -2.528755000000 | -0.408493000000 |
| O -1.494670000000 | -1.374189000000 | -0.074255000000 | O 0.278819000000  | -1.839414000000 | 0.229110000000  |
| H -1.872563000000 | -0.453567000000 | -0.026515000000 | H 1.202375000000  | -1.571897000000 | 0.047629000000  |
| O 0.507194000000  | -2.097493000000 | -0.012999000000 | H 2.432174000000  | 0.286018000000  | -0.205138000000 |
| O 2.521903000000  | 0.220355000000  | -0.013395000000 | O 2.690484000000  | -0.653056000000 | -0.244727000000 |
| H 2.157403000000  | -0.673255000000 | 0.000482000000  | H 3.468236000000  | -0.716095000000 | 0.313944000000  |
| H 3.274555000000  | 0.182595000000  | 0.581489000000  | N -2.219377000000 | 0.661351000000  | -0.018752000000 |
| O 0.479115000000  | 2.193368000000  | -0.011224000000 | O -0.930859000000 | 0.510286000000  | 0.445691000000  |
| H 1.165047000000  | 1.504043000000  | 0.033346000000  | O -2.724978000000 | -0.361938000000 | -0.374730000000 |
| H 0.788816000000  | 2.786920000000  | -0.699176000000 | H -0.649836000000 | -0.450163000000 | 0.349345000000  |
| <b>OHW3-5</b>     |                 |                 | <b>OHW3-6</b>     |                 |                 |
| O -0.693658000000 | 1.978541000000  | -0.008663000000 | O -1.153679000000 | 1.568032000000  | -0.092749000000 |
| H 0.261413000000  | 1.761236000000  | -0.014314000000 | H -1.473940000000 | 0.881243000000  | -0.714849000000 |
| H -0.781320000000 | 2.692324000000  | 0.627317000000  | H -1.536711000000 | 2.396821000000  | -0.389365000000 |
| N -1.730838000000 | -1.254505000000 | -0.017991000000 | O -1.862841000000 | -0.749942000000 | -1.287189000000 |
| O -2.379344000000 | -0.087358000000 | 0.030999000000  | H -1.258710000000 | -1.212174000000 | -1.873742000000 |
| H -1.704473000000 | 0.659378000000  | 0.009460000000  | H -1.731443000000 | -1.168776000000 | -0.421293000000 |
| O -0.527257000000 | -1.142328000000 | -0.099856000000 | O -1.409497000000 | -0.936398000000 | 1.477692000000  |
| O 1.975241000000  | 1.347546000000  | 0.002009000000  | H -0.670507000000 | -1.222172000000 | 2.020802000000  |
| H 2.158924000000  | 0.392327000000  | 0.049534000000  | H -1.356315000000 | 0.026551000000  | 1.499682000000  |
| H 2.542396000000  | 1.661211000000  | -0.706189000000 | N 1.587348000000  | -0.120577000000 | -0.452445000000 |
| O 2.308848000000  | -1.426082000000 | 0.015150000000  | O 1.380147000000  | 0.837004000000  | 0.520389000000  |
| H 1.406007000000  | -1.765142000000 | -0.009964000000 | O 2.595519000000  | -0.729852000000 | -0.268469000000 |
| H 2.762281000000  | -1.982345000000 | 0.652980000000  | H 0.519000000000  | 1.231794000000  | 0.248486000000  |

|                |                 |                 |                |                 |                 |
|----------------|-----------------|-----------------|----------------|-----------------|-----------------|
| <b>OHW3-7</b>  |                 |                 | <b>OHW3-8</b>  |                 |                 |
| O              | 1.132686000000  | 0.038179000000  | O              | -0.425043000000 | 2.178839000000  |
| H              | 1.959418000000  | -0.178534000000 | H              | -0.507717000000 | 2.945466000000  |
| H              | 0.935763000000  | 0.956999000000  | H              | 0.342925000000  | 1.680411000000  |
| N              | -1.838254000000 | -0.268754000000 | N              | -1.526764000000 | -0.785044000000 |
| O              | -1.091298000000 | -1.278506000000 | O              | -2.261986000000 | 0.247494000000  |
| H              | -0.212855000000 | -0.838595000000 | H              | -1.639822000000 | 1.019348000000  |
| O              | -2.947975000000 | -0.611040000000 | O              | -2.129112000000 | -1.820189000000 |
| O              | -0.214901000000 | 2.278056000000  | O              | 1.301521000000  | 0.344870000000  |
| H              | -0.960340000000 | 1.670691000000  | H              | 0.658984000000  | -0.370379000000 |
| H              | -0.601951000000 | 3.081578000000  | H              | 2.116546000000  | -0.007147000000 |
| O              | 3.570497000000  | -0.651274000000 | O              | 3.716786000000  | -0.654261000000 |
| H              | 4.418729000000  | -0.487145000000 | H              | 3.810995000000  | -0.862386000000 |
| H              | 3.736951000000  | -0.527036000000 | H              | 4.288111000000  | -1.284034000000 |
| <b>OHW3-9</b>  |                 |                 | <b>OHW3-10</b> |                 |                 |
| H              | -1.168218000000 | -0.434197000000 | O              | 0.351915000000  | -0.237362000000 |
| O              | -0.656920000000 | -1.264772000000 | H              | -0.029428000000 | -0.649178000000 |
| H              | -0.885987000000 | -1.812889000000 | H              | 1.072028000000  | -0.835431000000 |
| H              | -1.093573000000 | -1.158753000000 | N              | -2.941806000000 | 0.125100000000  |
| O              | -1.293296000000 | -0.398861000000 | O              | -1.829857000000 | 0.345611000000  |
| H              | -1.581595000000 | -0.772595000000 | H              | -1.039883000000 | 0.119399000000  |
| H              | -1.923170000000 | 0.857250000000  | O              | -2.714795000000 | -0.272821000000 |
| O              | -1.982367000000 | 1.072911000000  | O              | 2.718873000000  | -1.341811000000 |
| H              | -1.434634000000 | 1.857643000000  | H              | 2.991052000000  | -1.732949000000 |
| N              | 2.046627000000  | 0.516111000000  | H              | 3.087546000000  | -0.444518000000 |
| O              | 1.871631000000  | -0.797005000000 | O              | 2.684591000000  | 1.409043000000  |
| O              | 1.156290000000  | 1.230138000000  | H              | 1.788657000000  | 1.285878000000  |
| H              | 0.998091000000  | -0.888525000000 | H              | 3.036853000000  | 2.159820000000  |
| <b>OHW3-11</b> |                 |                 | <b>OHW3-12</b> |                 |                 |
| O              | 0.247245000000  | -1.280551000000 | O              | -1.291143000000 | -1.789820000000 |
| H              | -0.550692000000 | -1.643038000000 | H              | -1.179629000000 | -2.574597000000 |
| H              | 0.998897000000  | -1.611367000000 | H              | -2.034277000000 | -1.301924000000 |
| N              | -0.260887000000 | 1.979450000000  | N              | -0.003920000000 | 1.111795000000  |
| O              | 0.714998000000  | 1.256111000000  | O              | 0.642980000000  | 0.009087000000  |
| H              | 0.376597000000  | 0.322860000000  | H              | -0.044523000000 | -0.712102000000 |
| O              | -1.311521000000 | 1.396430000000  | O              | 0.699562000000  | 2.075596000000  |
| O              | 2.606257000000  | -0.809342000000 | O              | -2.839007000000 | 0.198626000000  |
| H              | 2.495810000000  | 0.132973000000  | H              | -2.145229000000 | 0.854802000000  |
| H              | 3.554275000000  | -0.930992000000 | H              | -3.660448000000 | 0.655116000000  |
| O              | -2.212725000000 | -1.524095000000 | O              | 3.131989000000  | -0.953537000000 |
| H              | -3.079859000000 | -1.868060000000 | H              | 3.915450000000  | -0.484653000000 |
| H              | -2.322852000000 | -0.566956000000 | H              | 2.421045000000  | -0.538816000000 |
| <b>OHW3-13</b> |                 |                 | <b>OHW3-14</b> |                 |                 |
| O              | -2.159469000000 | 1.365213000000  | O              | -2.151217000000 | 0.856856000000  |
| H              | -2.588232000000 | 0.491585000000  | H              | -1.983177000000 | 0.829833000000  |
| H              | -2.646377000000 | 1.924312000000  | H              | -1.871510000000 | 1.735048000000  |
| N              | 0.957271000000  | -0.031989000000 | N              | 1.844034000000  | 0.617234000000  |
| O              | 0.510324000000  | 1.229875000000  | O              | 2.065432000000  | -0.631250000000 |
| H              | -0.494791000000 | 1.228193000000  | H              | 2.684832000000  | -1.089341000000 |
| O              | 0.098085000000  | -0.880924000000 | O              | 1.087328000000  | 1.295191000000  |
| O              | 4.067114000000  | -0.433635000000 | O              | -1.252973000000 | -0.147876000000 |
| H              | 3.110230000000  | -0.323675000000 | H              | -1.080713000000 | -0.898817000000 |
| H              | 4.390844000000  | 0.467807000000  | H              | -1.712491000000 | -0.524698000000 |
| O              | -2.894586000000 | -1.287263000000 | O              | -0.740526000000 | -1.621152000000 |
| H              | -3.436778000000 | -1.852629000000 | H              | -1.197105000000 | -0.904148000000 |
| H              | -2.007528000000 | -1.657791000000 | H              | 0.187570000000  | -1.482669000000 |
| <b>OHW3-15</b> |                 |                 | <b>OHW3-16</b> |                 |                 |
| O              | -3.141415000000 | -1.164136000000 | O              | -3.309408000000 | -1.188616000000 |
| H              | -2.269468000000 | -1.462041000000 | H              | -3.427356000000 | -0.231616000000 |
| H              | -3.747640000000 | -1.827680000000 | H              | -3.625014000000 | -1.573107000000 |
| N              | 0.772352000000  | 0.279519000000  | N              | 2.566925000000  | 0.313763000000  |
| O              | -0.501561000000 | -0.165754000000 | O              | 3.929640000000  | 0.146831000000  |
| H              | -1.074067000000 | 0.628119000000  | H              | 4.238561000000  | 1.062696000000  |
| O              | 1.575102000000  | -0.596436000000 | O              | 2.026238000000  | -0.736120000000 |
| O              | -2.510011000000 | 1.509931000000  | O              | -2.769727000000 | 1.558865000000  |
| H              | -3.055518000000 | 0.745256000000  | H              | -1.976844000000 | 1.201258000000  |
| H              | -2.633790000000 | 2.150882000000  | H              | -3.088556000000 | 2.239499000000  |
| O              | 4.432890000000  | 0.198479000000  | O              | -0.937513000000 | -0.218071000000 |
| H              | 3.544678000000  | -0.032906000000 | H              | -1.542393000000 | -0.891681000000 |
| H              | 4.989302000000  | -0.414940000000 | H              | -0.060720000000 | -0.506509000000 |

|                |                 |                 |                 |   |                 |                 |                 |
|----------------|-----------------|-----------------|-----------------|---|-----------------|-----------------|-----------------|
| <b>OHW3-17</b> |                 |                 | <b>OHW3-18</b>  |   |                 |                 |                 |
| O              | -2.076322000000 | 1.525451000000  | 0.034721000000  | O | 1.972901000000  | 0.783319000000  | 0.327405000000  |
| H              | -2.009885000000 | 2.202828000000  | -0.642550000000 | H | 1.951034000000  | 1.537492000000  | -0.267380000000 |
| H              | -2.751167000000 | 0.903403000000  | -0.279828000000 | H | 2.754712000000  | 0.270256000000  | 0.064467000000  |
| N              | 0.846352000000  | -0.548153000000 | 0.429414000000  | N | -1.383755000000 | 0.241093000000  | 0.101782000000  |
| O              | -0.496710000000 | -0.542318000000 | 0.610988000000  | O | -0.383987000000 | -0.455102000000 | 0.671125000000  |
| H              | -0.847825000000 | 0.377141000000  | 0.429508000000  | H | 0.469813000000  | 0.048751000000  | 0.527850000000  |
| O              | 1.299837000000  | 0.526422000000  | 0.131230000000  | O | -1.049471000000 | 1.276308000000  | -0.419814000000 |
| O              | -3.216191000000 | -0.947353000000 | -0.520099000000 | O | -4.289031000000 | -0.879672000000 | -0.206375000000 |
| H              | -3.977477000000 | -1.478891000000 | -0.276104000000 | H | -3.382000000000 | -0.602129000000 | -0.035919000000 |
| H              | -2.459195000000 | -1.423093000000 | -0.159799000000 | H | -4.732582000000 | -0.054896000000 | -0.413964000000 |
| O              | 4.288661000000  | -0.066019000000 | -0.473568000000 | O | 4.206315000000  | -0.767728000000 | -0.380721000000 |
| H              | 4.335850000000  | -0.933220000000 | -0.066009000000 | H | 4.894698000000  | -0.918071000000 | 0.272686000000  |
| H              | 3.391035000000  | 0.219445000000  | -0.277299000000 | H | 4.076790000000  | -1.626054000000 | -0.793171000000 |
| <b>OHW3-19</b> |                 |                 | <b>OHW3-20</b>  |   |                 |                 |                 |
| O              | -3.232350000000 | -1.277021000000 | -0.338042000000 | O | -3.699551000000 | -0.807179000000 | -0.126081000000 |
| H              | -3.425087000000 | -0.330433000000 | -0.436763000000 | H | -3.913223000000 | -0.280872000000 | -0.902167000000 |
| H              | -3.518640000000 | -1.672094000000 | -1.163648000000 | H | -4.532694000000 | -0.920351000000 | 0.339093000000  |
| N              | 2.592876000000  | 0.337423000000  | -0.306927000000 | N | -0.569417000000 | 0.559977000000  | 0.062401000000  |
| O              | 3.957026000000  | 0.259460000000  | -0.294815000000 | O | -1.211351000000 | -0.256965000000 | 0.920062000000  |
| H              | 4.171244000000  | -0.573677000000 | 0.173494000000  | H | -2.114995000000 | -0.433777000000 | 0.547378000000  |
| O              | 2.059410000000  | -0.593654000000 | 0.227758000000  | O | -1.209854000000 | 0.889113000000  | -0.903151000000 |
| O              | -2.908372000000 | 1.497947000000  | -0.212586000000 | O | 2.435338000000  | 1.024370000000  | 0.422289000000  |
| H              | -2.083846000000 | 1.213279000000  | 0.217640000000  | H | 1.477454000000  | 0.913906000000  | 0.365963000000  |
| H              | -3.267467000000 | 2.170903000000  | 0.369047000000  | H | 2.599973000000  | 1.857078000000  | -0.026331000000 |
| O              | -0.936794000000 | -0.133000000000 | 0.855536000000  | O | 4.005204000000  | -1.231693000000 | -0.436324000000 |
| H              | -1.494440000000 | -0.843418000000 | 0.504791000000  | H | 3.474271000000  | -0.477096000000 | -0.144721000000 |
| H              | -0.043257000000 | -0.356376000000 | 0.581121000000  | H | 4.436843000000  | -1.519887000000 | 0.369625000000  |
| <b>OHW4-1</b>  |                 |                 | <b>OHW4-2</b>   |   |                 |                 |                 |
| O              | 0.253468000000  | -2.234857000000 | -0.147229000000 | O | 0.102421000000  | -2.147328000000 | 0.532009000000  |
| H              | 1.187164000000  | -1.934775000000 | -0.093664000000 | H | 0.974004000000  | -1.879248000000 | 0.167342000000  |
| H              | 0.158536000000  | -2.886699000000 | 0.551143000000  | H | 0.285330000000  | -2.481992000000 | 1.412381000000  |
| N              | -2.558638000000 | -0.526392000000 | 0.292375000000  | N | -1.996010000000 | 0.257671000000  | -0.076434000000 |
| O              | -1.383780000000 | -0.198710000000 | -0.374623000000 | O | -2.186091000000 | -1.072362000000 | -0.144451000000 |
| H              | -0.807106000000 | -1.010159000000 | -0.270867000000 | H | -1.304101000000 | -1.457461000000 | 0.122824000000  |
| O              | -3.338978000000 | 0.370860000000  | 0.271071000000  | O | -2.975230000000 | 0.888991000000  | -0.371784000000 |
| O              | 2.605736000000  | 1.458236000000  | 0.291116000000  | O | 2.794316000000  | 1.324417000000  | -0.147006000000 |
| H              | 2.841520000000  | 1.915300000000  | 1.101270000000  | H | 3.374614000000  | 1.723878000000  | 0.504620000000  |
| H              | 1.718784000000  | 1.799969000000  | 0.067135000000  | H | 1.913134000000  | 1.696055000000  | 0.046535000000  |
| O              | 2.760860000000  | -1.251218000000 | 0.026189000000  | O | 2.504924000000  | -1.369488000000 | -0.400062000000 |
| H              | 3.426586000000  | -1.409293000000 | -0.646630000000 | H | 2.843805000000  | -1.625618000000 | -1.260390000000 |
| H              | 2.756246000000  | -0.279477000000 | 0.146451000000  | H | 2.683364000000  | -0.409512000000 | -0.329754000000 |
| O              | 0.032581000000  | 2.252350000000  | -0.266262000000 | O | 0.237937000000  | 2.155164000000  | 0.456698000000  |
| H              | -0.246893000000 | 2.828120000000  | -0.981587000000 | H | -0.198094000000 | 2.938764000000  | 0.112442000000  |
| H              | -0.563470000000 | 1.488469000000  | -0.321983000000 | H | -0.426196000000 | 1.456280000000  | 0.355812000000  |
| <b>OHW4-3</b>  |                 |                 | <b>OHW4-4</b>   |   |                 |                 |                 |
| O              | -0.301779000000 | 1.146672000000  | 1.180493000000  | O | 0.367891000000  | -1.425999000000 | 1.008269000000  |
| H              | -0.271715000000 | 1.809519000000  | 1.874976000000  | H | 1.186064000000  | -1.526872000000 | 0.482595000000  |
| H              | -1.011341000000 | 1.439950000000  | 0.563087000000  | H | 0.535862000000  | -0.633060000000 | 1.530064000000  |
| N              | 2.851102000000  | 0.434742000000  | -0.295339000000 | N | -2.057151000000 | 0.142082000000  | -0.206727000000 |
| O              | 1.724821000000  | -0.281303000000 | 0.099603000000  | O | -1.893927000000 | -1.191167000000 | -0.270555000000 |
| H              | 1.117970000000  | 0.409659000000  | 0.450865000000  | H | -1.020357000000 | -1.335212000000 | 0.205716000000  |
| O              | 3.688070000000  | -0.279075000000 | -0.744018000000 | O | -3.064465000000 | 0.526947000000  | -0.734638000000 |
| O              | -2.318089000000 | 1.633374000000  | -0.514770000000 | O | 0.150957000000  | 1.562773000000  | 1.097842000000  |
| H              | -2.675015000000 | 0.739182000000  | -0.692819000000 | H | -0.668805000000 | 1.238140000000  | 0.687207000000  |
| H              | -2.246269000000 | 2.047997000000  | -1.377439000000 | H | -0.118314000000 | 2.311370000000  | 1.636655000000  |
| O              | -2.949427000000 | -0.996029000000 | -0.816289000000 | O | 2.695198000000  | -1.269379000000 | -0.419603000000 |
| H              | -2.246704000000 | -1.401816000000 | -0.272761000000 | H | 2.714778000000  | -0.327837000000 | -0.667571000000 |
| H              | -3.748190000000 | -1.477940000000 | -0.591953000000 | H | 3.074391000000  | -1.743682000000 | -1.161750000000 |
| O              | -0.866996000000 | -1.699147000000 | 0.841252000000  | O | 2.356853000000  | 1.467042000000  | -0.654422000000 |
| H              | -0.680835000000 | -0.841653000000 | 1.248663000000  | H | 2.195192000000  | 2.043061000000  | -1.404609000000 |
| H              | -0.008412000000 | -1.964028000000 | 0.494582000000  | H | 1.601189000000  | 1.617788000000  | -0.061966000000 |
| <b>OHW4-5</b>  |                 |                 | <b>OHW4-6</b>   |   |                 |                 |                 |
| O              | -0.762741000000 | -0.072741000000 | 2.139985000000  | O | -0.408880000000 | -1.942242000000 | -0.400971000000 |
| H              | -1.158615000000 | 0.049611000000  | 3.005275000000  | H | 0.562366000000  | -1.956122000000 | -0.256785000000 |
| H              | -0.941859000000 | 0.744594000000  | 1.652287000000  | H | -0.766773000000 | -2.596926000000 | 0.203732000000  |
| O              | -0.989729000000 | 1.711130000000  | -0.028938000000 | N | -2.607626000000 | 0.644420000000  | 0.182899000000  |
| H              | -1.199299000000 | 2.622733000000  | -0.249117000000 | O | -1.386052000000 | 0.493996000000  | -0.438539000000 |
| H              | -1.565908000000 | 1.163789000000  | -0.611990000000 | H | -1.100145000000 | -0.475117000000 | -0.396297000000 |
| O              | -2.277316000000 | -0.123481000000 | -1.478746000000 | O | -3.070663000000 | -0.380660000000 | 0.588929000000  |
| H              | -3.201058000000 | -0.350247000000 | -1.604432000000 | O | 2.897025000000  | 0.812911000000  | 0.431099000000  |
| H              | -1.878843000000 | -0.893796000000 | -1.018154000000 | H | 3.197972000000  | 1.161782000000  | 1.272901000000  |
| O              | -0.943832000000 | -1.913717000000 | 0.044537000000  | H | 2.170304000000  | 1.408393000000  | 0.164760000000  |

|                  |                |                |                  |                |                |
|------------------|----------------|----------------|------------------|----------------|----------------|
| H -0.90061200000 | -1.44440000000 | 0.89505900000  | O 2.25609300000  | -1.80948900000 | 0.03177900000  |
| H -0.01918700000 | -1.95889900000 | -0.21875900000 | H 2.90063000000  | -2.14245400000 | -0.59645300000 |
| N 1.80948300000  | -0.26336600000 | -0.31522700000 | H 2.53533400000  | -0.88764100000 | 0.20682700000  |
| O 1.71084000000  | 1.10441400000  | -0.22926600000 | O 0.72941000000  | -0.35332400000 | -0.27494700000 |
| O 2.94486700000  | -0.62511300000 | -0.38121600000 | H 0.69068200000  | 2.94354000000  | -1.03088800000 |
| H 0.74229500000  | 1.26622800000  | -0.17442500000 | H -0.07245100000 | 1.81088100000  | -0.34689900000 |
| <b>OHW4-7</b>    |                |                | <b>OHW4-8</b>    |                |                |
| O 2.71274400000  | 0.27107000000  | 0.23600400000  | O -0.71264000000 | -0.41580800000 | 1.63666700000  |
| H 3.57937000000  | 0.44845800000  | -0.13532100000 | H -1.23955900000 | -1.05282800000 | 1.10085100000  |
| H 2.15973500000  | 1.04584800000  | -0.00721600000 | H -0.67681700000 | -0.78776400000 | 2.52167100000  |
| N 0.12159200000  | -1.40546500000 | 0.01193600000  | N 2.53963400000  | -0.25434100000 | 0.36374600000  |
| O 1.34399900000  | -1.94906700000 | 0.05365900000  | O 1.30991100000  | 0.22660400000  | -0.08223800000 |
| H 1.93283300000  | -1.14154000000 | 0.10592400000  | H 0.68910300000  | -0.03422600000 | 0.63723300000  |
| O -0.75161700000 | -2.23869000000 | -0.04881600000 | O 3.40603900000  | -0.02991100000 | -0.41707700000 |
| O 1.09176500000  | 2.35112000000  | -0.37150300000 | O -1.77514600000 | 1.95390600000  | 0.38202500000  |
| H 1.02148500000  | 2.77214600000  | -1.23087100000 | H -1.46321600000 | 1.33141400000  | 1.05435800000  |
| H 0.16273500000  | 2.24038700000  | -0.08399500000 | H -1.43209500000 | 2.80664000000  | 0.65828200000  |
| O -1.53227000000 | 2.12273600000  | 0.37764500000  | O -2.07196100000 | -1.75999300000 | -0.22095800000 |
| H -2.02368400000 | 1.30459200000  | 0.18244400000  | H -1.81719500000 | -1.14068200000 | -0.93765900000 |
| O -1.78561000000 | 2.35031800000  | 1.27460700000  | H -2.01735100000 | -2.63669900000 | -0.60669100000 |
| H -2.84965800000 | -0.25497200000 | -0.24611500000 | O -1.17724500000 | 0.26963300000  | -1.79322900000 |
| H -2.28744300000 | -1.04082500000 | -0.17975800000 | H -1.43692400000 | 1.01953500000  | -1.23269800000 |
| H -3.73027000000 | -0.55870600000 | -0.01636000000 | H -0.21504400000 | 0.31955200000  | -1.78308400000 |
| <b>OHW4-9</b>    |                |                | <b>OHW4-10</b>   |                |                |
| O 0.22930300000  | 1.53536800000  | 0.88066400000  | O 2.50782200000  | -0.91091900000 | 0.09524400000  |
| H 1.09200700000  | 1.62662400000  | 0.43385300000  | H 2.51700400000  | 0.04736300000  | -0.12221500000 |
| H -0.41240500000 | 2.03815900000  | 0.35628200000  | H 3.10559700000  | -1.00840000000 | 0.83986900000  |
| N -1.56668600000 | -0.93906300000 | 0.04355300000  | N -0.65561600000 | -1.18807300000 | 0.13964700000  |
| O -0.38988700000 | -0.94178300000 | 0.73171500000  | O 0.22077000000  | -2.14812500000 | -0.17496700000 |
| H -0.17446300000 | 0.04841800000  | 0.85260100000  | H 1.10784800000  | -1.70515300000 | -0.03026300000 |
| O -1.93614700000 | -2.04076600000 | -0.24356500000 | O -1.80172100000 | -1.52559000000 | -0.03121700000 |
| O -2.05929100000 | 2.04104900000  | -0.64527100000 | O 2.32539100000  | 1.73871600000  | -0.37551900000 |
| H -2.30343900000 | 1.11238000000  | -0.55003500000 | H 1.41701100000  | 1.97619400000  | -0.10053600000 |
| H -2.88568100000 | 2.52316100000  | -0.56863900000 | H 2.47197700000  | 2.19924200000  | -1.20425200000 |
| O 2.65393800000  | 1.18190700000  | -0.36933600000 | O -0.18779600000 | 1.81555800000  | 0.65158000000  |
| H 2.65047400000  | 0.21071500000  | -0.42779800000 | H -1.07139900000 | 1.98275300000  | 0.29210200000  |
| H 3.52167300000  | 1.40292200000  | -0.02465500000 | H -0.22215800000 | 0.86128800000  | 0.78933300000  |
| O 2.23231700000  | -1.58252700000 | -0.28831100000 | O -2.83753900000 | 1.29091300000  | -0.31111600000 |
| H 1.32886600000  | -1.66372700000 | 0.04900600000  | H -3.72914300000 | 1.54743000000  | -0.06574500000 |
| H 2.30790100000  | -2.27118700000 | -0.95266100000 | H -2.82283400000 | 0.33137100000  | -0.20786000000 |
| <b>OHW4-11</b>   |                |                | <b>OHW4-12</b>   |                |                |
| H 0.31107800000  | 0.37698000000  | 1.62041700000  | O 0.00445800000  | -0.87028300000 | -1.17131400000 |
| O -0.00137700000 | 0.14076700000  | 0.74144300000  | H 0.20101200000  | -1.45008800000 | -1.91158600000 |
| H -0.64165200000 | 0.85466100000  | 0.51119900000  | H -0.69203400000 | -1.33360500000 | -0.65202800000 |
| H -4.33776200000 | -0.24042500000 | -1.15009600000 | N 2.97542300000  | 0.41748900000  | 0.59542700000  |
| O -3.81966400000 | -0.03019900000 | -0.37044500000 | O 1.69051600000  | 0.74411100000  | 0.23942100000  |
| H -3.25674800000 | -0.81287400000 | -0.22634600000 | H 1.28766900000  | -0.03228800000 | -0.23035500000 |
| H -2.70710300000 | 1.34351300000  | -0.12254900000 | O 3.29850800000  | -0.68797500000 | 0.26805600000  |
| O -1.93202600000 | 1.88832900000  | 0.11992800000  | O -2.03632000000 | -1.83840600000 | 0.27911500000  |
| H -1.88867000000 | 2.57934700000  | -0.54457900000 | H -2.55433800000 | -1.03544100000 | 0.49175200000  |
| H -1.11065700000 | -1.36560600000 | 0.41226600000  | H -1.97251700000 | -2.31900000000 | 1.10745000000  |
| O -1.85284200000 | -1.90789100000 | 0.09852500000  | O -3.12819700000 | 0.61605200000  | 0.72438800000  |
| H -1.81617500000 | -2.71023300000 | 0.62341400000  | H -2.45341500000 | 1.17388000000  | 0.29126400000  |
| N 3.17853600000  | 0.07443400000  | 0.24485100000  | H -3.97027000000 | 0.98308400000  | 0.44728700000  |
| O 2.27324100000  | -0.15185200000 | -0.77098900000 | O -1.04375500000 | 1.77912900000  | -0.64361200000 |
| O 4.30556400000  | -0.00063700000 | -0.13562700000 | H -0.67793800000 | 0.99991500000  | -1.08662700000 |
| H 1.41477800000  | -0.05454000000 | -0.30035500000 | H -0.27779900000 | 2.15008700000  | -0.19358000000 |
| <b>OHW4-13</b>   |                |                | <b>OHW4-14</b>   |                |                |
| O -1.90508900000 | -1.51934000000 | -0.19826400000 | O -1.82061500000 | 1.76926100000  | 0.01946200000  |
| H -1.31720800000 | -2.10252700000 | -0.68619100000 | H -0.85917300000 | 1.94484900000  | -0.07553300000 |
| H -1.41909400000 | -1.34825400000 | 0.62761400000  | H -2.12234900000 | 2.40290800000  | 0.67453500000  |
| O -0.41492000000 | -0.58108500000 | 1.96934100000  | N -1.69991800000 | -1.61196000000 | 0.01359800000  |
| H -0.58711600000 | -0.57539100000 | 2.91346000000  | O -2.67693400000 | -0.71855100000 | 0.12601400000  |
| H -0.26450700000 | 0.34647100000  | 1.73064600000  | H -2.28416500000 | 0.21274000000  | 0.08294800000  |
| O -0.02958100000 | 1.79950600000  | 0.49989100000  | O -0.59742500000 | -1.12137600000 | -0.12964900000 |
| H 0.01145400000  | 2.75161800000  | 0.62211800000  | O 0.81178500000  | 2.36675800000  | -0.21166600000 |
| O -0.77176500000 | 1.64873600000  | -0.13164800000 | H 1.51566800000  | 1.71600000000  | -0.01833800000 |
| H -1.99052700000 | 1.02292500000  | -1.15231100000 | H 1.11853900000  | 2.81629500000  | -1.00215700000 |
| H -2.04676800000 | 0.07230200000  | -0.91348400000 | O 2.84876700000  | 0.58419900000  | 0.24089300000  |
| H -2.90234300000 | 1.31365800000  | -1.22397600000 | H 2.65379200000  | -0.36228900000 | 0.11220400000  |
| N 2.18106600000  | -0.72391700000 | -0.63227400000 | H 3.36319700000  | 0.61533900000  | 1.05042400000  |
| O 2.38072500000  | 0.49990300000  | -0.07364500000 | O 2.06859300000  | -2.05250600000 | -0.05337100000 |



|                |                 |                 |                 |                |                 |                 |                 |
|----------------|-----------------|-----------------|-----------------|----------------|-----------------|-----------------|-----------------|
| O              | 1.026613000000  | -0.967348000000 | -0.864372000000 | H              | 1.104710000000  | -1.999568000000 | -0.128591000000 |
| H              | 1.492116000000  | 0.924308000000  | 0.042251000000  | H              | 2.335832000000  | -2.684824000000 | -0.724137000000 |
| <b>OHW4-15</b> |                 |                 |                 | <b>OHW4-16</b> |                 |                 |                 |
| O              | -1.356274000000 | -1.449790000000 | -0.802482000000 | O              | -0.487280000000 | -0.929405000000 | -1.683227000000 |
| H              | -2.053682000000 | -1.362634000000 | -0.135699000000 | H              | -1.288784000000 | -0.395614000000 | -1.710084000000 |
| H              | -1.220452000000 | -0.522022000000 | -1.049328000000 | H              | 0.211435000000  | -0.303564000000 | -1.899495000000 |
| N              | 1.382510000000  | -0.699761000000 | 0.055783000000  | N              | 2.032377000000  | 0.276317000000  | -0.256245000000 |
| O              | 1.050623000000  | -1.996585000000 | 0.054819000000  | O              | 1.308716000000  | 0.591110000000  | 0.877504000000  |
| H              | 0.100692000000  | -1.943773000000 | -0.265741000000 | H              | 0.567732000000  | 1.142102000000  | 0.520711000000  |
| O              | 2.512202000000  | -0.497143000000 | 0.432968000000  | O              | 2.981853000000  | -0.399167000000 | -0.005928000000 |
| O              | -1.112810000000 | 1.479248000000  | -0.680501000000 | O              | -2.730839000000 | 0.099139000000  | 0.193004000000  |
| H              | -0.212378000000 | 1.741908000000  | -0.410797000000 | H              | -2.216559000000 | -0.595427000000 | 0.656136000000  |
| H              | -1.360860000000 | 2.132804000000  | -1.339628000000 | H              | -3.630211000000 | 0.022844000000  | 0.518406000000  |
| O              | -2.980691000000 | 0.076068000000  | 0.932385000000  | O              | -0.871408000000 | -1.696362000000 | 1.005022000000  |
| H              | -2.405618000000 | 0.777867000000  | 0.592766000000  | H              | -0.537576000000 | -1.669807000000 | 0.092775000000  |
| H              | -3.170815000000 | 0.320951000000  | 1.839808000000  | H              | -0.126863000000 | -1.372734000000 | 1.522169000000  |
| O              | 1.490710000000  | 2.295712000000  | 0.005423000000  | O              | -0.778997000000 | 1.947296000000  | -0.133454000000 |
| H              | 2.071885000000  | 1.542603000000  | 0.176861000000  | H              | -1.611787000000 | 1.464502000000  | 0.034089000000  |
| H              | 1.743573000000  | 2.950550000000  | 0.660389000000  | H              | -0.970383000000 | 2.872592000000  | 0.035635000000  |
| <b>OHW4-17</b> |                 |                 |                 | <b>OHW4-18</b> |                 |                 |                 |
| H              | 0.591606000000  | -0.474635000000 | -1.326210000000 | O              | -0.013668000000 | -1.603910000000 | -0.788210000000 |
| O              | 0.182645000000  | -0.229020000000 | -0.489857000000 | H              | 0.915440000000  | -1.679385000000 | -0.493616000000 |
| H              | -0.508603000000 | -0.914096000000 | -0.334948000000 | H              | -0.542927000000 | -2.128618000000 | -0.173463000000 |
| H              | -4.310470000000 | 0.380548000000  | 0.892746000000  | N              | -0.585995000000 | 1.552709000000  | -0.160578000000 |
| O              | -3.721303000000 | 0.334530000000  | 0.177027000000  | O              | -1.369574000000 | 0.568148000000  | -0.653780000000 |
| H              | -3.106752000000 | 0.885277000000  | 0.088776000000  | H              | -0.745671000000 | -0.223683000000 | -0.765374000000 |
| H              | -2.659063000000 | -1.298409000000 | 0.058715000000  | O              | -1.191769000000 | 2.561428000000  | 0.074325000000  |
| O              | -1.891109000000 | -1.884530000000 | -0.092318000000 | O              | 2.581616000000  | -1.479944000000 | 0.071155000000  |
| H              | -1.962887000000 | -2.572831000000 | 0.572480000000  | H              | 2.665769000000  | -0.528447000000 | 0.260885000000  |
| H              | -0.884242000000 | 1.319980000000  | -0.297801000000 | H              | 3.343053000000  | -1.691517000000 | -0.473250000000 |
| O              | -1.628403000000 | 1.909313000000  | -0.090291000000 | O              | 2.354070000000  | 1.249875000000  | 0.445932000000  |
| H              | -1.498647000000 | 2.680253000000  | -0.646594000000 | H              | 2.540681000000  | 1.787607000000  | 1.219093000000  |
| N              | 3.478199000000  | 0.077441000000  | 0.310766000000  | H              | 1.423960000000  | 1.430066000000  | 0.243832000000  |
| O              | 2.396603000000  | 0.071792000000  | 1.131907000000  | O              | -2.328557000000 | -1.859653000000 | 0.825690000000  |
| O              | 3.211909000000  | -0.063196000000 | -0.854916000000 | H              | -3.148153000000 | -2.333040000000 | 0.984810000000  |
| H              | 1.588935000000  | -0.050671000000 | 0.565058000000  | H              | -2.607132000000 | -0.989496000000 | 0.520232000000  |
| <b>OHW4-19</b> |                 |                 |                 | <b>OHW4-20</b> |                 |                 |                 |
| O              | 0.026701000000  | -1.089334000000 | 1.140422000000  | O              | -0.712273000000 | 0.210006000000  | -0.097890000000 |
| H              | 0.826243000000  | -1.451392000000 | 0.712196000000  | H              | -1.349662000000 | 0.266973000000  | 0.638107000000  |
| H              | 0.316529000000  | -0.225873000000 | 1.458562000000  | H              | -0.328416000000 | 1.099994000000  | -0.186743000000 |
| N              | -2.680711000000 | -0.042801000000 | -0.683586000000 | N              | 2.430441000000  | -0.347292000000 | 0.062559000000  |
| O              | -2.158617000000 | -1.201476000000 | -0.297960000000 | O              | 1.474536000000  | -1.310129000000 | 0.121672000000  |
| H              | -1.316130000000 | -1.059293000000 | 0.251167000000  | H              | 0.626065000000  | -0.792152000000 | 0.073931000000  |
| O              | -2.074260000000 | 0.942626000000  | -0.311749000000 | O              | 3.541198000000  | -0.792523000000 | 0.169688000000  |
| O              | 0.416453000000  | 1.796401000000  | 0.878458000000  | O              | 1.049323000000  | 2.326496000000  | -0.223612000000 |
| H              | -0.465544000000 | 1.646695000000  | 0.507295000000  | H              | 1.787721000000  | 1.705596000000  | -0.162222000000 |
| H              | 0.344875000000  | 2.618568000000  | 1.370779000000  | H              | 1.333039000000  | 2.994353000000  | -0.852029000000 |
| O              | 2.407524000000  | -1.633866000000 | -0.119746000000 | O              | -2.984213000000 | -0.028176000000 | 1.440677000000  |
| H              | 2.602329000000  | -0.770851000000 | -0.524640000000 | H              | -3.433640000000 | -0.279857000000 | 0.618641000000  |
| H              | 2.733167000000  | -2.291546000000 | -0.736935000000 | H              | -3.602238000000 | 0.538023000000  | 1.907359000000  |
| O              | 2.556135000000  | 1.048263000000  | -0.827653000000 | O              | -3.187765000000 | -0.577038000000 | -1.276259000000 |
| H              | 2.486737000000  | 1.510797000000  | -1.665499000000 | H              | -2.240448000000 | -0.377442000000 | -1.232980000000 |
| H              | 1.845290000000  | 1.421600000000  | -0.282003000000 | H              | -3.251967000000 | -1.353540000000 | -1.836193000000 |
| <b>OHW4-21</b> |                 |                 |                 | <b>OHW4-22</b> |                 |                 |                 |
| O              | -1.026862000000 | 2.181264000000  | -0.273706000000 | O              | -2.130811000000 | 1.551523000000  | 0.550199000000  |
| H              | -0.894872000000 | 2.947633000000  | 0.288855000000  | H              | -2.305738000000 | 1.906606000000  | 1.424668000000  |
| H              | -0.209032000000 | 1.654593000000  | -0.194822000000 | H              | -1.348713000000 | 2.049948000000  | 0.227675000000  |
| N              | -2.118617000000 | -0.769102000000 | 0.082669000000  | N              | -0.986231000000 | -1.450259000000 | -0.141415000000 |
| O              | -2.938986000000 | 0.312655000000  | -0.014210000000 | O              | -2.241497000000 | -1.069413000000 | 0.189678000000  |
| H              | -2.302715000000 | 1.067790000000  | -0.103223000000 | H              | -2.172004000000 | -0.083251000000 | 0.316655000000  |
| O              | -2.721325000000 | -1.795874000000 | 0.202903000000  | O              | -0.891326000000 | -2.633164000000 | -0.316863000000 |
| O              | 0.800825000000  | 0.160509000000  | -0.000321000000 | O              | 0.145447000000  | 2.721388000000  | -0.314971000000 |
| H              | 0.057533000000  | -0.457233000000 | -0.010582000000 | H              | 0.717265000000  | 1.940733000000  | -0.474720000000 |
| H              | 1.414697000000  | -0.152060000000 | -0.690637000000 | H              | 0.215036000000  | 3.246628000000  | -1.115059000000 |
| O              | 3.046957000000  | -0.685697000000 | -1.344489000000 | O              | 3.744861000000  | -0.616916000000 | 0.604299000000  |
| H              | 3.607103000000  | -0.314346000000 | -2.029260000000 | H              | 4.303558000000  | -0.057418000000 | 1.149756000000  |
| H              | 3.520979000000  | -0.531881000000 | -0.512318000000 | H              | 4.362351000000  | -1.156042000000 | 0.103299000000  |
| O              | 3.316052000000  | 0.014340000000  | 1.334090000000  | O              | 1.401354000000  | 0.366000000000  | -0.698213000000 |
| H              | 2.352851000000  | 0.087401000000  | 1.261482000000  | H              | 0.715554000000  | -0.288100000000 | -0.509115000000 |
| H              | 3.470488000000  | -0.415756000000 | 2.177673000000  | H              | 2.192092000000  | 0.037373000000  | -0.246282000000 |

|                |                |                |                |   |                |                |                |
|----------------|----------------|----------------|----------------|---|----------------|----------------|----------------|
| <b>OHW4-23</b> |                |                | <b>OHW4-24</b> |   |                |                |                |
| O              | 0.21946600000  | 1.19851400000  | 0.85879000000  | O | 0.25945200000  | -1.63596400000 | 0.76912400000  |
| H              | 0.98983200000  | 1.60757800000  | 0.43462700000  | H | 0.64505100000  | -0.77122300000 | 0.97669600000  |
| H              | -0.57477600000 | 1.60534300000  | 0.46500100000  | H | 0.91010800000  | -1.98780200000 | 0.14343400000  |
| N              | 0.89834200000  | -2.00321800000 | -0.06317500000 | N | -2.50821400000 | -0.11004400000 | -0.31864300000 |
| O              | -0.08884700000 | -1.32369400000 | 0.56117500000  | O | -2.21538700000 | -1.38760700000 | -0.09235600000 |
| H              | 0.16133100000  | -0.33206600000 | 0.68908600000  | H | -1.26595900000 | -1.45256700000 | 0.25948200000  |
| O              | 1.88960600000  | -1.35148000000 | -0.28052700000 | O | -1.62579500000 | 0.66220500000  | -0.00153700000 |
| O              | -2.21200700000 | 1.80931100000  | -0.28802200000 | O | 1.86499800000  | 0.81190300000  | 0.73538500000  |
| H              | -2.92196200000 | 2.30928200000  | 0.12034800000  | H | 1.34651800000  | 1.54714900000  | 0.35420200000  |
| H              | -2.56060700000 | 0.90377900000  | -0.36614500000 | H | 2.31449800000  | 1.20400700000  | 1.48836500000  |
| O              | -2.79681800000 | -0.91692300000 | -0.29852300000 | O | 0.21317200000  | 2.79923800000  | -0.23765000000 |
| H              | -3.12370500000 | -1.50160500000 | -0.98588400000 | H | -0.65227000000 | 2.37337900000  | -0.28956100000 |
| H              | -1.96051300000 | -1.31364200000 | -0.01402500000 | H | 0.28640600000  | 3.30877700000  | -1.04816900000 |
| O              | 2.71082400000  | 1.59481300000  | -0.34073000000 | O | 2.50223300000  | -1.40278300000 | -0.93131900000 |
| H              | 2.81449600000  | 0.64887100000  | -0.48975600000 | H | 3.40371500000  | -1.67304600000 | -1.11587300000 |
| H              | 3.10972300000  | 2.01065800000  | -1.10832900000 | H | 2.58004300000  | -0.55430200000 | -0.47124400000 |
| <b>OHW4-25</b> |                |                | <b>OHW4-26</b> |   |                |                |                |
| O              | -2.53954800000 | -0.49078000000 | -0.18791200000 | O | -1.55757800000 | -0.01129100000 | -0.77969300000 |
| H              | -2.93141700000 | -0.67377100000 | 0.66973000000  | H | -2.36604700000 | 0.10952500000  | -0.26107600000 |
| H              | -2.31158800000 | 0.46288300000  | -0.15982000000 | H | -1.02330900000 | 0.79255700000  | -0.63260500000 |
| N              | 0.58654000000  | -1.70579000000 | 0.12598600000  | N | 1.11217300000  | -1.06549400000 | 0.02687100000  |
| O              | -0.23656700000 | -1.50669400000 | -0.91239900000 | O | 0.14109100000  | -1.90918700000 | -0.34329100000 |
| H              | -1.15474500000 | -1.26462500000 | -0.56379700000 | H | -0.61061300000 | -1.26075300000 | -0.52340100000 |
| O              | 0.05712300000  | -1.72592000000 | 1.21128200000  | O | 2.15401700000  | -1.61980200000 | 0.28649400000  |
| O              | -1.64166400000 | 2.06358700000  | -0.09387400000 | O | 0.15078000000  | 2.13902800000  | -0.32216100000 |
| H              | -1.80429900000 | 2.70937100000  | -0.78481100000 | H | 1.04106800000  | 1.85740400000  | -0.05040500000 |
| H              | -0.67770200000 | 2.10668600000  | 0.06128600000  | H | 0.31360600000  | 2.81153100000  | -0.98726500000 |
| O              | 1.06142600000  | 2.18499300000  | 0.40218700000  | O | -4.01631000000 | 0.18897500000  | 0.66165700000  |
| H              | 1.69662800000  | 1.52738100000  | 0.06837200000  | H | -4.80191500000 | -0.11652000000 | 0.20077100000  |
| H              | 1.33779400000  | 2.34630000000  | 1.30700500000  | H | -4.10655800000 | -0.16922800000 | 1.54844300000  |
| O              | 2.76216300000  | 0.15523000000  | -0.50583600000 | O | 2.82156300000  | 1.37686000000  | 0.36845700000  |
| H              | 3.70084300000  | -0.01259500000 | -0.39761300000 | H | 2.89200600000  | 0.41591200000  | 0.42916400000  |
| H              | 2.33525200000  | -0.70441900000 | -0.38984000000 | H | 3.32804300000  | 1.70136300000  | 1.11657900000  |
| <b>OHW4-27</b> |                |                | <b>OHW4-28</b> |   |                |                |                |
| O              | -1.10894000000 | 1.77775600000  | -0.50233600000 | O | -0.52041700000 | 0.28652300000  | -0.06255700000 |
| H              | -0.96035900000 | 2.64130200000  | -0.11043000000 | H | -1.18473700000 | 0.37216700000  | 0.64577600000  |
| H              | -0.28220100000 | 1.27868800000  | -0.36066000000 | H | -0.09943300000 | 1.16066700000  | -0.14192700000 |
| N              | -3.04224500000 | -0.98202500000 | 0.26351100000  | N | 2.57451700000  | -1.27833200000 | -0.13178000000 |
| O              | -3.31623300000 | 0.31064800000  | 0.01968500000  | O | 1.29466300000  | -1.67703800000 | 0.18249000000  |
| H              | -2.46412800000 | 0.80413600000  | -0.16080300000 | H | 0.68565600000  | -0.88056400000 | 0.12037600000  |
| O              | -1.86829300000 | -1.26424400000 | 0.20863800000  | O | 2.72482700000  | -0.08298100000 | 0.02513600000  |
| O              | 0.88566000000  | -0.04697000000 | -0.01697100000 | O | 1.17778700000  | 2.46383700000  | -0.19811300000 |
| H              | 0.24388300000  | -0.76507500000 | 0.02530700000  | H | 1.97073500000  | 1.91673200000  | -0.16428700000 |
| H              | 1.55652500000  | -0.33326300000 | -0.66489100000 | H | 1.36992100000  | 3.14060800000  | -0.85146400000 |
| O              | 3.25920200000  | -0.67697800000 | -1.24924200000 | O | -2.85951600000 | 0.09798300000  | 1.38950100000  |
| H              | 3.76376000000  | -0.29644100000 | -1.97130300000 | H | -3.27028400000 | -0.18078000000 | 0.55594300000  |
| H              | 3.69092500000  | -0.36239400000 | -0.43963200000 | H | -3.50208200000 | 0.67132800000  | 1.81214900000  |
| O              | 3.36866000000  | 0.34779700000  | 1.33393400000  | O | -2.94493900000 | -0.53655100000 | -1.31579200000 |
| H              | 2.40696200000  | 0.25917900000  | 1.26241000000  | H | -2.00372200000 | -0.31998600000 | -1.23372700000 |
| H              | 3.57990400000  | 0.06397500000  | 2.22576400000  | H | -2.96691300000 | -1.34603400000 | -1.83060800000 |
| <b>OHW4-29</b> |                |                | <b>OHW4-30</b> |   |                |                |                |
| O              | -0.74049600000 | -1.24381500000 | -0.84846300000 | H | 1.96833600000  | 2.71305700000  | -0.66488700000 |
| H              | 0.14408600000  | -1.56761600000 | -0.58883700000 | O | 1.93342700000  | 1.99753400000  | -0.02588700000 |
| H              | -1.37250800000 | -1.65974600000 | -0.24783000000 | H | 1.10489600000  | 1.53571700000  | -0.21877200000 |
| N              | -0.56197200000 | 2.07003300000  | -0.06661300000 | H | 2.06362600000  | -2.58263300000 | -0.68208000000 |
| O              | -1.49300900000 | 1.18641300000  | -0.45686700000 | O | 1.77236500000  | -1.90957400000 | -0.06278100000 |
| H              | -1.04982200000 | 0.29159300000  | -0.68507000000 | H | 2.56954100000  | -1.38168800000 | 0.15111600000  |
| O              | 0.57000400000  | 1.65170600000  | -0.14566900000 | H | 3.21739000000  | 0.75034800000  | 0.29249100000  |
| O              | -2.96854500000 | -1.00703300000 | 0.90042300000  | O | 3.70943400000  | -0.07767000000 | 0.44177300000  |
| H              | -3.89139400000 | -1.22154400000 | 1.05289000000  | H | 4.17379000000  | 0.05706900000  | 1.27080800000  |
| H              | -2.97132900000 | -0.06993200000 | 0.67814900000  | N | -1.27002700000 | -0.44598000000 | -0.12342500000 |
| O              | 3.12322000000  | 0.38159200000  | 0.54004300000  | O | -0.01010600000 | -0.05626700000 | -0.50459700000 |
| H              | 3.54934000000  | 0.61261300000  | 1.36886600000  | O | -2.05016200000 | 0.45572200000  | -0.21010400000 |
| H              | 2.47157100000  | 1.07785200000  | 0.39956000000  | H | 0.56798000000  | -0.86194500000 | -0.36546800000 |
| O              | 1.80332700000  | -2.00043200000 | -0.10799700000 | O | -5.02064400000 | -0.14124700000 | 0.41125500000  |
| H              | 2.36972400000  | -2.47670300000 | -0.71912100000 | H | -4.08224800000 | -0.00848700000 | 0.24556300000  |
| H              | 2.32812600000  | -1.22481700000 | 0.15592500000  | H | -5.36762900000 | 0.75244200000  | 0.43792400000  |

|                   |                 |                 |                   |                 |                 |
|-------------------|-----------------|-----------------|-------------------|-----------------|-----------------|
| <b>OHW4-31</b>    |                 |                 | <b>OHW4-32</b>    |                 |                 |
| O 0.614406000000  | 2.397554000000  | -0.093746000000 | O 1.747460000000  | 1.940549000000  | 0.362110000000  |
| H 0.568138000000  | 3.013386000000  | 0.641536000000  | H 2.373279000000  | 1.486091000000  | -0.234725000000 |
| H 1.424973000000  | 1.868426000000  | 0.065179000000  | H 2.289025000000  | 2.566726000000  | 0.846987000000  |
| N -0.328781000000 | -0.442759000000 | -0.371241000000 | N -2.820024000000 | -0.212014000000 | -0.530494000000 |
| O -1.188938000000 | 0.580771000000  | -0.597241000000 | O -4.115228000000 | 0.082810000000  | -0.854250000000 |
| H -0.602416000000 | 1.373602000000  | -0.413714000000 | H -4.522905000000 | 0.424399000000  | -0.031901000000 |
| O -0.842236000000 | -1.520093000000 | -0.515144000000 | O -2.554501000000 | 0.014153000000  | 0.616385000000  |
| O 2.769297000000  | 0.779260000000  | 0.344556000000  | O 2.194671000000  | -1.907945000000 | -0.004385000000 |
| H 2.559919000000  | -0.171211000000 | 0.335846000000  | H 1.499642000000  | -1.454388000000 | 0.515382000000  |
| H 3.576491000000  | 0.848788000000  | -0.170330000000 | H 2.587014000000  | -2.533317000000 | 0.608255000000  |
| O -3.801183000000 | -0.036298000000 | 0.734323000000  | O 0.449056000000  | -0.299662000000 | 1.342643000000  |
| H -4.087521000000 | -0.839585000000 | 0.294842000000  | H 0.819540000000  | 0.570809000000  | 1.106210000000  |
| H -3.031342000000 | 0.226982000000  | 0.219181000000  | H -0.488870000000 | -0.224880000000 | 1.145145000000  |
| O 2.217661000000  | -1.999379000000 | 0.218837000000  | O 3.371503000000  | 0.297126000000  | -1.132012000000 |
| H 1.298290000000  | -2.189964000000 | 0.000842000000  | H 3.376901000000  | 0.201164000000  | -2.086605000000 |
| H 2.442886000000  | -2.645632000000 | 0.892631000000  | H 3.062852000000  | -0.568747000000 | -0.799227000000 |
| <b>OHW4-33</b>    |                 |                 | <b>OHW4-34</b>    |                 |                 |
| H 4.810758000000  | 0.400982000000  | 0.408312000000  | O 1.099379000000  | -0.457326000000 | 0.193272000000  |
| O 4.114045000000  | 0.151870000000  | -0.202345000000 | H 0.590651000000  | -1.212385000000 | 0.505042000000  |
| H 3.476431000000  | 0.891236000000  | -0.156568000000 | H 1.856005000000  | -0.838197000000 | -0.298807000000 |
| H -0.555640000000 | -0.310082000000 | 0.088733000000  | N -1.901887000000 | 0.846883000000  | -0.656907000000 |
| O 0.288436000000  | -0.082378000000 | 0.487417000000  | O -0.659104000000 | 1.260626000000  | -0.944797000000 |
| H 0.867806000000  | -0.847285000000 | 0.315584000000  | H -0.013777000000 | 0.611182000000  | -0.542841000000 |
| H 1.309867000000  | 1.345422000000  | 0.174915000000  | O -1.946842000000 | -0.175954000000 | -0.010739000000 |
| O 2.054498000000  | 1.957914000000  | 0.009846000000  | O 3.532940000000  | -1.162335000000 | -0.779877000000 |
| H 1.747354000000  | 2.526705000000  | -0.698991000000 | H 3.934405000000  | -0.513687000000 | -0.180468000000 |
| H 3.044260000000  | -1.314569000000 | -0.105751000000 | H 3.953030000000  | -1.018417000000 | -1.630828000000 |
| O 2.279737000000  | -1.919776000000 | -0.065992000000 | O -4.854261000000 | -0.756643000000 | 0.709514000000  |
| H 2.587014000000  | -2.669150000000 | 0.447759000000  | H -5.323853000000 | -0.071803000000 | 0.229221000000  |
| N -3.321517000000 | 0.320029000000  | 0.100910000000  | H -3.933133000000 | -0.594548000000 | 0.480918000000  |
| O -4.687648000000 | 0.041116000000  | -0.026971000000 | O 3.551982000000  | 0.796552000000  | 1.172559000000  |
| O -2.667064000000 | -0.531543000000 | -0.401995000000 | H 2.604408000000  | 0.634403000000  | 1.264891000000  |
| H -5.093246000000 | 0.798918000000  | 0.419957000000  | H 3.852717000000  | 1.035917000000  | 2.051762000000  |
| <b>OHW4-35</b>    |                 |                 | <b>OHW4-36</b>    |                 |                 |
| O 3.781445000000  | -1.071059000000 | -0.871259000000 | H 1.232210000000  | 1.535664000000  | 0.328459000000  |
| H 4.094627000000  | -0.488610000000 | -0.160406000000 | O 0.383478000000  | 1.823860000000  | 0.695593000000  |
| H 4.038317000000  | -1.952414000000 | -0.593572000000 | H 0.480898000000  | 2.764139000000  | 0.865645000000  |
| N -1.648265000000 | -1.007479000000 | 0.533070000000  | H -2.167828000000 | -2.041975000000 | -0.546248000000 |
| O -2.976331000000 | -1.142029000000 | 0.691243000000  | O -2.431312000000 | -1.243954000000 | -0.083441000000 |
| H -3.414556000000 | -0.363602000000 | 0.256934000000  | H -1.775221000000 | -1.155819000000 | 0.625657000000  |
| O -1.324971000000 | -0.012367000000 | -0.072920000000 | H -2.272571000000 | 0.540988000000  | -0.989719000000 |
| O 3.802494000000  | 0.975203000000  | 1.045461000000  | O -1.955940000000 | 1.417804000000  | -1.244566000000 |
| H 2.917451000000  | 1.099430000000  | 0.659381000000  | H -1.188845000000 | 1.533638000000  | -0.675742000000 |
| H 4.197612000000  | 1.849154000000  | 1.034754000000  | H -0.251546000000 | 0.345823000000  | 1.650303000000  |
| H 1.564807000000  | 0.673707000000  | -0.548416000000 | O -0.452717000000 | -0.585846000000 | 1.835953000000  |
| H 2.044819000000  | -0.092086000000 | -0.896691000000 | H 0.627745000000  | -0.615546000000 | 2.779397000000  |
| H 0.672244000000  | 0.355392000000  | -0.378060000000 | N 1.833196000000  | -1.127036000000 | -0.527537000000 |
| O -4.173818000000 | 1.008896000000  | -0.561670000000 | O 2.492420000000  | 0.200535000000  | -0.301295000000 |
| H -4.900464000000 | 1.557290000000  | -0.253704000000 | O 0.762962000000  | -0.981387000000 | -0.953992000000 |
| H -3.501208000000 | 1.628991000000  | -0.859641000000 | H 3.347147000000  | -0.065759000000 | 0.068986000000  |
| <b>OHW4-37</b>    |                 |                 |                   |                 |                 |
| O -2.868319000000 | 0.284229000000  | -0.678430000000 |                   |                 |                 |
| H -3.081660000000 | 1.220719000000  | -0.695220000000 |                   |                 |                 |
| H -3.646155000000 | -0.154494000000 | -0.295781000000 |                   |                 |                 |
| N 0.410920000000  | 0.733227000000  | 0.074293000000  |                   |                 |                 |
| O -0.379815000000 | -0.350131000000 | 0.061584000000  |                   |                 |                 |
| H -1.301059000000 | -0.064960000000 | -0.214205000000 |                   |                 |                 |
| O -0.132538000000 | 1.769282000000  | -0.222291000000 |                   |                 |                 |
| O 3.360741000000  | 0.483364000000  | 0.775605000000  |                   |                 |                 |
| H 2.419212000000  | 0.514073000000  | 0.558180000000  |                   |                 |                 |
| H 3.638436000000  | 1.401030000000  | 0.724759000000  |                   |                 |                 |
| O 5.088083000000  | -1.393889000000 | -0.554562000000 |                   |                 |                 |
| H 4.480619000000  | -0.769449000000 | -0.132788000000 |                   |                 |                 |
| H 5.305934000000  | -1.997896000000 | 0.157186000000  |                   |                 |                 |
| O -5.082859000000 | -1.056381000000 | 0.401392000000  |                   |                 |                 |
| H -5.543426000000 | -1.693688000000 | -0.151125000000 |                   |                 |                 |
| H -5.030688000000 | -1.479713000000 | 1.262551000000  |                   |                 |                 |
